# Supplementary material for: Long-term effects of western diet consumption in male and female mice
Source: PubMed Central journal article supplement (PMC7477228; doi:10.1038/s41598-020-71592-9), 2020-09-07
Supplement: 41598_2020_71592_MOESM1_ESM.pdf [file 41598_2020_71592_MOESM1_ESM.pdf]

## **Supplementary information**

### **Long-Term Effects of Western Diet Consumption in Male and Female Mice**

Yu Hasegawa, Shin-Yu Chen, Lili Sheng, Prasant Kumar Jena, Karen M. Kalanetra,  
David A. Mills, Yu-Jui Yvonne Wan, Carolyn M. Slupsky\*

#### **Table of contents**

##### **- Supplementary Tables**

- **Supplementary Table 1.** Summary of linear regression analysis to evaluate the impact of diet, sex and age on serum metabolites.
- **Supplementary Table 2.** Serum metabolite concentrations ( $\mu\text{mol/L}$ ) from male and female mice on a standard chow control diet (CD) or Western diet (WD).
- **Supplementary Table 3.** Summary of linear regression analysis to evaluate the impact of diet, sex and age on urine metabolites.
- **Supplementary Table 4.** Urine metabolite concentrations ( $\mu\text{mol/L}$ ) from male and female mice on the CD or WD.
- **Supplementary Table 5.** Summary of multivariate response linear regression analysis on the balance of microbial communities.
- **Supplementary Table 6.** Fecal microbes identified as significantly different in abundance between male and female mice accounting for diet.
- **Supplementary Table 7.** Fecal microbes significantly in abundance between CD and WD accounting for sex.
- **Supplementary Table 8.** Cecal microbes significantly different in abundance between male and female mice accounting for diet.
- **Supplementary Table 9.** Cecal microbes significantly different in abundance between CD and WD accounting for sex.
- **Supplementary Table 10.** Nutritional composition of the diets used in this study.
- **Supplementary Table 11.** Formula of the diets used in this study.
- **Supplementary Table 12.** Fatty acid composition of the diets used in this study.

- **Supplementary Table 13.** Sample sizes for serum, urine, fecal and cecal samples.

### **Supplementary Figures**

- **Supplementary Figure 1.** Boxplots showing the concentrations of serum and urine metabolites.
- **Supplementary Figure 2.** Volcano plots showing the difference in the serum metabolome between CD and WD for male and female mice.
- **Supplementary Figure 3.** Heatmaps showing the rate of increase in the median concentration of metabolites from the WD group compared to the CD group.
- **Supplementary Figure 4.** Boxplots showing the concentrations of TMA+TMAO measured from serum and urine samples as well as the relative abundance of fecal and cecal gut microbes. Correlation between fecal abundance of *Erysipelotrichaceae* and serum or urinary TMA.
- **Supplementary Figure 5.** NMDS plots before and after removing samples with high glucose.
- **Supplementary Figure 6.** Volcano plots showing the difference in the urine metabolome between male and female mice on either the CD or WD.
- **Supplementary Figure 7.** Outliers removed in this study from the serum and cecal datasets.



**Supplementary Table 2.** Serum metabolite concentrations ( $\mu\text{mol/L}$ ) from male and female mice on a standard chow control diet (CD) or Western diet (WD). The concentrations are expressed with mean  $\pm$  standard deviation (SD).

| Metabolite            | Sex    | Control Diet |       |      |           |       |      |           |       |      | Western Diet |       |      |           |       |      |           |       |      |
|-----------------------|--------|--------------|-------|------|-----------|-------|------|-----------|-------|------|--------------|-------|------|-----------|-------|------|-----------|-------|------|
|                       |        | 5 months     |       |      | 10 months |       |      | 15 months |       |      | 5 months     |       |      | 10 months |       |      | 15 months |       |      |
| 1,3-Dihydroxyacetone  | Male   | 183          | $\pm$ | 84   | 136       | $\pm$ | 59   | 14        | $\pm$ | 12   | 189          | $\pm$ | 95   | 147       | $\pm$ | 87   | 12        | $\pm$ | 5    |
|                       | Female | 201          | $\pm$ | 43   | 183       | $\pm$ | 83   | 20        | $\pm$ | 10   | 165          | $\pm$ | 64   | 82        | $\pm$ | 51   | 15        | $\pm$ | 4    |
| 2-Hydroxybutyrate     | Male   | 16           | $\pm$ | 4    | 16        | $\pm$ | 4    | 15        | $\pm$ | 3    | 15           | $\pm$ | 10   | 13        | $\pm$ | 3    | 11        | $\pm$ | 3    |
|                       | Female | 22           | $\pm$ | 10   | 18        | $\pm$ | 12   | 21        | $\pm$ | 14   | 22           | $\pm$ | 11   | 11        | $\pm$ | 4    | 11        | $\pm$ | 5    |
| 2-Hydroxyisobutyrate  | Male   | 12           | $\pm$ | 2    | 11        | $\pm$ | 2    | 13        | $\pm$ | 2    | 16           | $\pm$ | 3    | 14        | $\pm$ | 2    | 19        | $\pm$ | 5    |
|                       | Female | 3            | $\pm$ | 1    | 1         | $\pm$ | 0    | 3         | $\pm$ | 2    | 5            | $\pm$ | 4    | 2         | $\pm$ | 1    | 4         | $\pm$ | 1    |
| 2-Oxoglutarate        | Male   | 49           | $\pm$ | 9    | 46        | $\pm$ | 9    | 61        | $\pm$ | 22   | 52           | $\pm$ | 21   | 67        | $\pm$ | 11   | 85        | $\pm$ | 11   |
|                       | Female | 44           | $\pm$ | 9    | 48        | $\pm$ | 25   | 48        | $\pm$ | 9    | 41           | $\pm$ | 15   | 55        | $\pm$ | 12   | 60        | $\pm$ | 16   |
| 2-Oxoisocaproate      | Male   | 6            | $\pm$ | 1    | 7         | $\pm$ | 1    | 5         | $\pm$ | 1    | 8            | $\pm$ | 2    | 6         | $\pm$ | 2    | 5         | $\pm$ | 0    |
|                       | Female | 7            | $\pm$ | 2    | 9         | $\pm$ | 5    | 4         | $\pm$ | 1    | 6            | $\pm$ | 1    | 6         | $\pm$ | 1    | 5         | $\pm$ | 2    |
| 3-Hydroxybutyrate     | Male   | 95           | $\pm$ | 90   | 43        | $\pm$ | 12   | 59        | $\pm$ | 29   | 195          | $\pm$ | 233  | 56        | $\pm$ | 21   | 59        | $\pm$ | 31   |
|                       | Female | 170          | $\pm$ | 157  | 87        | $\pm$ | 72   | 89        | $\pm$ | 67   | 176          | $\pm$ | 60   | 121       | $\pm$ | 123  | 91        | $\pm$ | 17   |
| 3-Hydroxyisobutyrate  | Male   | 44           | $\pm$ | 8    | 43        | $\pm$ | 8    | 35        | $\pm$ | 10   | 41           | $\pm$ | 10   | 32        | $\pm$ | 9    | 20        | $\pm$ | 4    |
|                       | Female | 42           | $\pm$ | 20   | 59        | $\pm$ | 16   | 27        | $\pm$ | 8    | 36           | $\pm$ | 9    | 26        | $\pm$ | 5    | 21        | $\pm$ | 7    |
| Acetate               | Male   | 48           | $\pm$ | 22   | 62        | $\pm$ | 24   | 59        | $\pm$ | 6    | 45           | $\pm$ | 8    | 53        | $\pm$ | 6    | 56        | $\pm$ | 6    |
|                       | Female | 74           | $\pm$ | 45   | 80        | $\pm$ | 40   | 58        | $\pm$ | 9    | 51           | $\pm$ | 12   | 58        | $\pm$ | 6    | 62        | $\pm$ | 4    |
| Acetoacetate          | Male   | 15           | $\pm$ | 13   | 11        | $\pm$ | 8    | 6         | $\pm$ | 2    | 26           | $\pm$ | 21   | 10        | $\pm$ | 4    | 6         | $\pm$ | 2    |
|                       | Female | 23           | $\pm$ | 24   | 20        | $\pm$ | 13   | 7         | $\pm$ | 4    | 22           | $\pm$ | 7    | 21        | $\pm$ | 19   | 10        | $\pm$ | 2    |
| Acetone               | Male   | 6            | $\pm$ | 2    | 5         | $\pm$ | 1    | 3         | $\pm$ | 1    | 10           | $\pm$ | 4    | 6         | $\pm$ | 2    | 2         | $\pm$ | 1    |
|                       | Female | 5            | $\pm$ | 2    | 7         | $\pm$ | 3    | 3         | $\pm$ | 1    | 6            | $\pm$ | 3    | 9         | $\pm$ | 6    | 2         | $\pm$ | 1    |
| Alanine               | Male   | 490          | $\pm$ | 98   | 617       | $\pm$ | 77   | 680       | $\pm$ | 101  | 495          | $\pm$ | 92   | 550       | $\pm$ | 95   | 727       | $\pm$ | 73   |
|                       | Female | 464          | $\pm$ | 151  | 552       | $\pm$ | 127  | 567       | $\pm$ | 112  | 413          | $\pm$ | 65   | 473       | $\pm$ | 105  | 624       | $\pm$ | 113  |
| Arginine              | Male   | 131          | $\pm$ | 50   | 218       | $\pm$ | 71   | 158       | $\pm$ | 52   | 188          | $\pm$ | 67   | 106       | $\pm$ | 37   | 88        | $\pm$ | 22   |
|                       | Female | 149          | $\pm$ | 21   | 227       | $\pm$ | 79   | 109       | $\pm$ | 24   | 142          | $\pm$ | 45   | 115       | $\pm$ | 45   | 53        | $\pm$ | 4    |
| Asparagine            | Male   | 52           | $\pm$ | 13   | 87        | $\pm$ | 30   | 71        | $\pm$ | 20   | 61           | $\pm$ | 27   | 72        | $\pm$ | 18   | 68        | $\pm$ | 12   |
|                       | Female | 28           | $\pm$ | 28   | 77        | $\pm$ | 29   | 58        | $\pm$ | 22   | 39           | $\pm$ | 29   | 56        | $\pm$ | 10   | 53        | $\pm$ | 17   |
| Aspartate             | Male   | 75           | $\pm$ | 13   | 101       | $\pm$ | 43   | 112       | $\pm$ | 14   | 84           | $\pm$ | 35   | 117       | $\pm$ | 35   | 117       | $\pm$ | 19   |
|                       | Female | 35           | $\pm$ | 10   | 55        | $\pm$ | 15   | 84        | $\pm$ | 14   | 46           | $\pm$ | 18   | 74        | $\pm$ | 10   | 72        | $\pm$ | 7    |
| Betaine               | Male   | 31           | $\pm$ | 6    | 30        | $\pm$ | 8    | 30        | $\pm$ | 2    | 33           | $\pm$ | 6    | 27        | $\pm$ | 3    | 32        | $\pm$ | 5    |
|                       | Female | 34           | $\pm$ | 10   | 32        | $\pm$ | 10   | 54        | $\pm$ | 12   | 43           | $\pm$ | 6    | 36        | $\pm$ | 5    | 45        | $\pm$ | 2    |
| Carnitine             | Male   | 26           | $\pm$ | 6    | 44        | $\pm$ | 31   | 33        | $\pm$ | 3    | 29           | $\pm$ | 9    | 30        | $\pm$ | 4    | 38        | $\pm$ | 3    |
|                       | Female | 33           | $\pm$ | 6    | 45        | $\pm$ | 15   | 35        | $\pm$ | 4    | 36           | $\pm$ | 4    | 29        | $\pm$ | 4    | 34        | $\pm$ | 1    |
| Choline               | Male   | 124          | $\pm$ | 14   | 154       | $\pm$ | 27   | 204       | $\pm$ | 32   | 131          | $\pm$ | 17   | 180       | $\pm$ | 22   | 199       | $\pm$ | 33   |
|                       | Female | 122          | $\pm$ | 12   | 140       | $\pm$ | 16   | 191       | $\pm$ | 55   | 138          | $\pm$ | 7    | 164       | $\pm$ | 12   | 149       | $\pm$ | 12   |
| Citrate               | Male   | 309          | $\pm$ | 29   | 236       | $\pm$ | 79   | 265       | $\pm$ | 26   | 320          | $\pm$ | 56   | 267       | $\pm$ | 24   | 260       | $\pm$ | 47   |
|                       | Female | 210          | $\pm$ | 81   | 241       | $\pm$ | 14   | 283       | $\pm$ | 83   | 284          | $\pm$ | 33   | 292       | $\pm$ | 17   | 281       | $\pm$ | 33   |
| Creatine              | Male   | 253          | $\pm$ | 60   | 255       | $\pm$ | 36   | 323       | $\pm$ | 52   | 287          | $\pm$ | 66   | 235       | $\pm$ | 32   | 280       | $\pm$ | 42   |
|                       | Female | 263          | $\pm$ | 39   | 259       | $\pm$ | 35   | 317       | $\pm$ | 76   | 225          | $\pm$ | 31   | 274       | $\pm$ | 28   | 280       | $\pm$ | 30   |
| Ethanol (contaminant) | Male   | 16           | $\pm$ | 7    | 48        | $\pm$ | 43   | 31        | $\pm$ | 30   | 352          | $\pm$ | 959  | 16        | $\pm$ | 4    | 19        | $\pm$ | 12   |
|                       | Female | 8            | $\pm$ | 7    | 324       | $\pm$ | 124  | 17        | $\pm$ | 10   | 7            | $\pm$ | 11   | 212       | $\pm$ | 237  | 17        | $\pm$ | 3    |
| Formate               | Male   | 70           | $\pm$ | 12   | 113       | $\pm$ | 42   | 76        | $\pm$ | 12   | 82           | $\pm$ | 21   | 68        | $\pm$ | 11   | 77        | $\pm$ | 17   |
|                       | Female | 62           | $\pm$ | 9    | 63        | $\pm$ | 5    | 70        | $\pm$ | 19   | 90           | $\pm$ | 37   | 66        | $\pm$ | 8    | 93        | $\pm$ | 26   |
| Fumarate              | Male   | 15           | $\pm$ | 5    | 20        | $\pm$ | 9    | 16        | $\pm$ | 3    | 11           | $\pm$ | 3    | 11        | $\pm$ | 4    | 12        | $\pm$ | 3    |
|                       | Female | 17           | $\pm$ | 4    | 12        | $\pm$ | 4    | 11        | $\pm$ | 3    | 15           | $\pm$ | 6    | 8         | $\pm$ | 2    | 8         | $\pm$ | 2    |
| Glucose               | Male   | 7044         | $\pm$ | 1474 | 5714      | $\pm$ | 1096 | 4669      | $\pm$ | 770  | 9470         | $\pm$ | 2263 | 6407      | $\pm$ | 1033 | 5278      | $\pm$ | 1231 |
|                       | Female | 5744         | $\pm$ | 1273 | 5660      | $\pm$ | 1422 | 5142      | $\pm$ | 1165 | 8421         | $\pm$ | 874  | 6213      | $\pm$ | 851  | 7725      | $\pm$ | 1532 |
| Glutamate             | Male   | 206          | $\pm$ | 30   | 259       | $\pm$ | 66   | 279       | $\pm$ | 33   | 233          | $\pm$ | 53   | 254       | $\pm$ | 42   | 233       | $\pm$ | 45   |
|                       | Female | 156          | $\pm$ | 33   | 204       | $\pm$ | 54   | 207       | $\pm$ | 38   | 155          | $\pm$ | 14   | 171       | $\pm$ | 15   | 153       | $\pm$ | 13   |
| Glutamine             | Male   | 498          | $\pm$ | 67   | 603       | $\pm$ | 98   | 556       | $\pm$ | 58   | 570          | $\pm$ | 58   | 570       | $\pm$ | 48   | 655       | $\pm$ | 45   |
|                       | Female | 645          | $\pm$ | 97   | 648       | $\pm$ | 81   | 620       | $\pm$ | 90   | 681          | $\pm$ | 79   | 612       | $\pm$ | 62   | 586       | $\pm$ | 109  |

| Metabolite             | Sex    | Control Diet |   |      |           |   |      |           |   |      | Western Diet |   |      |           |   |      |           |   |      |
|------------------------|--------|--------------|---|------|-----------|---|------|-----------|---|------|--------------|---|------|-----------|---|------|-----------|---|------|
|                        |        | 5 months     |   |      | 10 months |   |      | 15 months |   |      | 5 months     |   |      | 10 months |   |      | 15 months |   |      |
|                        |        |              | ± |      |           | ± |      |           | ± |      |              | ± |      |           | ± |      |           | ± |      |
| Glycerol               | Male   | 1096         | ± | 172  | 1010      | ± | 261  | 786       | ± | 113  | 1233         | ± | 222  | 821       | ± | 142  | 803       | ± | 85   |
|                        | Female | 1552         | ± | 245  | 1270      | ± | 459  | 979       | ± | 226  | 1486         | ± | 252  | 885       | ± | 67   | 984       | ± | 110  |
| Glycine                | Male   | 243          | ± | 42   | 244       | ± | 48   | 273       | ± | 37   | 257          | ± | 56   | 248       | ± | 36   | 272       | ± | 29   |
|                        | Female | 216          | ± | 33   | 200       | ± | 21   | 230       | ± | 34   | 234          | ± | 14   | 219       | ± | 29   | 254       | ± | 44   |
| Glycolate              | Male   | 51           | ± | 12   | 42        | ± | 5    | 29        | ± | 7    | 61           | ± | 20   | 58        | ± | 11   | 26        | ± | 7    |
|                        | Female | 33           | ± | 12   | 40        | ± | 10   | 26        | ± | 5    | 59           | ± | 26   | 59        | ± | 5    | 34        | ± | 12   |
| Histidine              | Male   | 61           | ± | 16   | 61        | ± | 30   | 72        | ± | 24   | 61           | ± | 19   | 54        | ± | 27   | 66        | ± | 15   |
|                        | Female | 74           | ± | 15   | 48        | ± | 8    | 67        | ± | 16   | 60           | ± | 15   | 50        | ± | 4    | 54        | ± | 17   |
| Isoleucine             | Male   | 103          | ± | 23   | 126       | ± | 18   | 135       | ± | 23   | 97           | ± | 27   | 115       | ± | 22   | 111       | ± | 18   |
|                        | Female | 99           | ± | 10   | 121       | ± | 24   | 107       | ± | 11   | 95           | ± | 20   | 102       | ± | 13   | 112       | ± | 23   |
| Lactate                | Male   | 13930        | ± | 1526 | 13294     | ± | 1929 | 19203     | ± | 1809 | 13148        | ± | 1662 | 12117     | ± | 1540 | 17148     | ± | 2643 |
|                        | Female | 11140        | ± | 1189 | 10884     | ± | 1406 | 16612     | ± | 2222 | 10651        | ± | 1311 | 11564     | ± | 590  | 13258     | ± | 2562 |
| Leucine                | Male   | 160          | ± | 36   | 217       | ± | 45   | 193       | ± | 33   | 163          | ± | 55   | 204       | ± | 48   | 172       | ± | 23   |
|                        | Female | 145          | ± | 14   | 178       | ± | 43   | 140       | ± | 16   | 138          | ± | 32   | 154       | ± | 23   | 135       | ± | 31   |
| Lysine                 | Male   | 513          | ± | 122  | 579       | ± | 84   | 631       | ± | 140  | 415          | ± | 91   | 445       | ± | 85   | 446       | ± | 90   |
|                        | Female | 500          | ± | 60   | 591       | ± | 95   | 558       | ± | 118  | 425          | ± | 86   | 452       | ± | 80   | 482       | ± | 98   |
| Malate                 | Male   | 110          | ± | 43   | 140       | ± | 48   | 144       | ± | 27   | 112          | ± | 37   | 108       | ± | 28   | 102       | ± | 21   |
|                        | Female | 107          | ± | 16   | 135       | ± | 51   | 103       | ± | 28   | 66           | ± | 32   | 81        | ± | 19   | 71        | ± | 17   |
| Methionine             | Male   | 153          | ± | 51   | 164       | ± | 23   | 160       | ± | 39   | 119          | ± | 29   | 117       | ± | 33   | 123       | ± | 40   |
|                        | Female | 137          | ± | 55   | 185       | ± | 76   | 123       | ± | 38   | 98           | ± | 29   | 113       | ± | 34   | 124       | ± | 7    |
| N-Methylhydantoin      | Male   | 4            | ± | 1    | 5         | ± | 2    | 4         | ± | 0    | 10           | ± | 6    | 9         | ± | 1    | 11        | ± | 2    |
|                        | Female | 7            | ± | 4    | 8         | ± | 2    | 7         | ± | 2    | 14           | ± | 6    | 10        | ± | 1    | 12        | ± | 2    |
| O-Acetylcarnitine      | Male   | 14           | ± | 3    | 13        | ± | 4    | 15        | ± | 2    | 15           | ± | 3    | 13        | ± | 2    | 15        | ± | 2    |
|                        | Female | 17           | ± | 5    | 17        | ± | 9    | 16        | ± | 2    | 18           | ± | 2    | 15        | ± | 3    | 15        | ± | 1    |
| Ornithine              | Male   | 78           | ± | 30   | 97        | ± | 13   | 134       | ± | 47   | 85           | ± | 23   | 218       | ± | 56   | 209       | ± | 35   |
|                        | Female | 41           | ± | 10   | 82        | ± | 17   | 161       | ± | 56   | 91           | ± | 10   | 149       | ± | 56   | 207       | ± | 45   |
| Phenylalanine          | Male   | 74           | ± | 16   | 101       | ± | 31   | 94        | ± | 11   | 82           | ± | 26   | 88        | ± | 20   | 88        | ± | 9    |
|                        | Female | 63           | ± | 18   | 75        | ± | 14   | 75        | ± | 16   | 62           | ± | 10   | 70        | ± | 8    | 71        | ± | 11   |
| Proline                | Male   | 179          | ± | 55   | 245       | ± | 58   | 190       | ± | 70   | 184          | ± | 40   | 193       | ± | 54   | 141       | ± | 29   |
|                        | Female | 169          | ± | 66   | 257       | ± | 77   | 127       | ± | 32   | 139          | ± | 33   | 149       | ± | 34   | 128       | ± | 30   |
| Pyruvate               | Male   | 162          | ± | 60   | 221       | ± | 67   | 510       | ± | 67   | 195          | ± | 73   | 149       | ± | 50   | 431       | ± | 48   |
|                        | Female | 138          | ± | 13   | 180       | ± | 79   | 433       | ± | 72   | 183          | ± | 25   | 251       | ± | 64   | 417       | ± | 59   |
| Serine                 | Male   | 179          | ± | 41   | 260       | ± | 58   | 200       | ± | 40   | 196          | ± | 52   | 226       | ± | 51   | 198       | ± | 39   |
|                        | Female | 189          | ± | 83   | 221       | ± | 61   | 186       | ± | 30   | 155          | ± | 45   | 186       | ± | 25   | 148       | ± | 36   |
| Succinate              | Male   | 36           | ± | 9    | 34        | ± | 8    | 56        | ± | 13   | 35           | ± | 9    | 30        | ± | 8    | 42        | ± | 7    |
|                        | Female | 31           | ± | 5    | 32        | ± | 12   | 47        | ± | 16   | 32           | ± | 9    | 29        | ± | 4    | 44        | ± | 11   |
| Taurine                | Male   | 1123         | ± | 109  | 1095      | ± | 130  | 1425      | ± | 93   | 1066         | ± | 173  | 1136      | ± | 113  | 1318      | ± | 201  |
|                        | Female | 971          | ± | 138  | 865       | ± | 68   | 1228      | ± | 91   | 878          | ± | 125  | 1005      | ± | 67   | 1099      | ± | 112  |
| Threonine              | Male   | 298          | ± | 74   | 335       | ± | 29   | 316       | ± | 79   | 271          | ± | 60   | 272       | ± | 46   | 225       | ± | 43   |
|                        | Female | 279          | ± | 69   | 289       | ± | 100  | 238       | ± | 65   | 260          | ± | 50   | 223       | ± | 27   | 223       | ± | 38   |
| Trimethylamine         | Male   | 10           | ± | 3    | 10        | ± | 3    | 13        | ± | 3    | 2            | ± | 1    | 3         | ± | 1    | 3         | ± | 2    |
|                        | Female | 1            | ± | 0    | 2         | ± | 2    | 5         | ± | 3    | 1            | ± | 1    | 0         | ± | 0    | 1         | ± | 0    |
| Trimethylamine-N-oxide | Male   | 6            | ± | 2    | 10        | ± | 3    | 11        | ± | 1    | 9            | ± | 3    | 7         | ± | 1    | 9         | ± | 3    |
|                        | Female | 39           | ± | 5    | 21        | ± | 10   | 14        | ± | 3    | 10           | ± | 6    | 9         | ± | 1    | 7         | ± | 0    |
| Tryptophan             | Male   | 48           | ± | 10   | 51        | ± | 18   | 47        | ± | 10   | 57           | ± | 20   | 59        | ± | 14   | 42        | ± | 6    |
|                        | Female | 48           | ± | 10   | 55        | ± | 14   | 33        | ± | 5    | 48           | ± | 12   | 56        | ± | 6    | 39        | ± | 5    |
| Tyrosine               | Male   | 149          | ± | 48   | 203       | ± | 47   | 177       | ± | 41   | 125          | ± | 37   | 128       | ± | 35   | 116       | ± | 19   |
|                        | Female | 128          | ± | 49   | 139       | ± | 39   | 120       | ± | 39   | 91           | ± | 27   | 106       | ± | 14   | 104       | ± | 21   |
| Urea                   | Male   | 5956         | ± | 936  | 5241      | ± | 501  | 5664      | ± | 977  | 5662         | ± | 1416 | 4926      | ± | 1235 | 4785      | ± | 1027 |
|                        | Female | 6587         | ± | 1117 | 5238      | ± | 591  | 4530      | ± | 925  | 4565         | ± | 882  | 4209      | ± | 371  | 4631      | ± | 801  |
| Valine                 | Male   | 294          | ± | 61   | 340       | ± | 53   | 348       | ± | 62   | 262          | ± | 66   | 306       | ± | 56   | 297       | ± | 42   |
|                        | Female | 281          | ± | 54   | 324       | ± | 87   | 269       | ± | 41   | 216          | ± | 45   | 254       | ± | 35   | 252       | ± | 36   |



**Supplementary Table 4.** Urine metabolite concentrations ( $\mu\text{mol/L}$ ) from male and female mice on a CD or a WD. Concentrations are expressed with mean  $\pm$  SD.

| Metabolite                        | Sex    | Control Diet |       |       |           |       |       |           |       |      | Western Diet |       |       |           |       |       |           |       |       |
|-----------------------------------|--------|--------------|-------|-------|-----------|-------|-------|-----------|-------|------|--------------|-------|-------|-----------|-------|-------|-----------|-------|-------|
|                                   |        | 5 months     |       |       | 10 months |       |       | 15 months |       |      | 5 months     |       |       | 10 months |       |       | 15 months |       |       |
| N-Methyl-2-pyridone-5-carboxamide | Male   | 246          | $\pm$ | 70    | 340       | $\pm$ | 79    | 277       | $\pm$ | 101  | 329          | $\pm$ | 80    | 499       | $\pm$ | 124   | 321       | $\pm$ | 139   |
|                                   | Female | 255          | $\pm$ | 97    | 189       | $\pm$ | 122   | 380       | $\pm$ | 68   | 458          | $\pm$ | 72    | 436       | $\pm$ | 162   | 477       | $\pm$ | 148   |
| N-Methyl-4-pyridone-3-carboxamide | Male   | 166          | $\pm$ | 46    | 229       | $\pm$ | 54    | 193       | $\pm$ | 68   | 224          | $\pm$ | 56    | 344       | $\pm$ | 91    | 224       | $\pm$ | 97    |
|                                   | Female | 169          | $\pm$ | 66    | 124       | $\pm$ | 80    | 253       | $\pm$ | 46   | 315          | $\pm$ | 50    | 307       | $\pm$ | 121   | 321       | $\pm$ | 98    |
| 1-Methylnicotinamide              | Male   | 323          | $\pm$ | 133   | 539       | $\pm$ | 144   | 355       | $\pm$ | 135  | 326          | $\pm$ | 114   | 489       | $\pm$ | 154   | 309       | $\pm$ | 170   |
|                                   | Female | 744          | $\pm$ | 289   | 524       | $\pm$ | 292   | 1134      | $\pm$ | 224  | 930          | $\pm$ | 179   | 746       | $\pm$ | 258   | 778       | $\pm$ | 90    |
| 2-Hydroxyisobutyrate              | Male   | 46           | $\pm$ | 12    | 42        | $\pm$ | 12    | 39        | $\pm$ | 7    | 40           | $\pm$ | 18    | 64        | $\pm$ | 21    | 48        | $\pm$ | 12    |
|                                   | Female | 29           | $\pm$ | 12    | 31        | $\pm$ | 22    | 47        | $\pm$ | 7    | 46           | $\pm$ | 19    | 70        | $\pm$ | 35    | 67        | $\pm$ | 32    |
| 2-Hydroxyvalerate                 | Male   | 135          | $\pm$ | 57    | 137       | $\pm$ | 49    | 102       | $\pm$ | 45   | 187          | $\pm$ | 59    | 225       | $\pm$ | 77    | 169       | $\pm$ | 62    |
|                                   | Female | 118          | $\pm$ | 66    | 72        | $\pm$ | 89    | 102       | $\pm$ | 35   | 151          | $\pm$ | 59    | 301       | $\pm$ | 219   | 304       | $\pm$ | 147   |
| 2-Oxoisocaproate                  | Male   | 304          | $\pm$ | 98    | 177       | $\pm$ | 99    | 181       | $\pm$ | 90   | 255          | $\pm$ | 105   | 186       | $\pm$ | 101   | 95        | $\pm$ | 23    |
|                                   | Female | 973          | $\pm$ | 366   | 868       | $\pm$ | 541   | 1207      | $\pm$ | 210  | 1196         | $\pm$ | 207   | 1688      | $\pm$ | 954   | 1141      | $\pm$ | 148   |
| 3-Indoxyl sulfate                 | Male   | 752          | $\pm$ | 286   | 1270      | $\pm$ | 290   | 1186      | $\pm$ | 835  | 579          | $\pm$ | 161   | 868       | $\pm$ | 209   | 1051      | $\pm$ | 308   |
|                                   | Female | 1172         | $\pm$ | 522   | 745       | $\pm$ | 560   | 1301      | $\pm$ | 186  | 1222         | $\pm$ | 362   | 1216      | $\pm$ | 345   | 1295      | $\pm$ | 407   |
| 3-Methyl-2-oxovalerate            | Male   | 227          | $\pm$ | 53    | 171       | $\pm$ | 45    | 147       | $\pm$ | 49   | 204          | $\pm$ | 47    | 189       | $\pm$ | 54    | 126       | $\pm$ | 41    |
|                                   | Female | 532          | $\pm$ | 215   | 440       | $\pm$ | 308   | 707       | $\pm$ | 125  | 553          | $\pm$ | 204   | 896       | $\pm$ | 433   | 870       | $\pm$ | 201   |
| 4-Hydroxyphenylacetate            | Male   | 239          | $\pm$ | 57    | 210       | $\pm$ | 106   | 181       | $\pm$ | 62   | 158          | $\pm$ | 50    | 127       | $\pm$ | 66    | 74        | $\pm$ | 35    |
|                                   | Female | 81           | $\pm$ | 41    | 87        | $\pm$ | 60    | 81        | $\pm$ | 21   | 159          | $\pm$ | 65    | 146       | $\pm$ | 45    | 87        | $\pm$ | 6     |
| 4-Hydroxyphenyllactate            | Male   | 110          | $\pm$ | 38    | 86        | $\pm$ | 32    | 77        | $\pm$ | 15   | 69           | $\pm$ | 20    | 77        | $\pm$ | 24    | 56        | $\pm$ | 25    |
|                                   | Female | 50           | $\pm$ | 18    | 55        | $\pm$ | 39    | 87        | $\pm$ | 13   | 81           | $\pm$ | 14    | 75        | $\pm$ | 19    | 97        | $\pm$ | 7     |
| 5,6-Dihydrouracil                 | Male   | 196          | $\pm$ | 61    | 209       | $\pm$ | 63    | 176       | $\pm$ | 34   | 199          | $\pm$ | 57    | 306       | $\pm$ | 98    | 215       | $\pm$ | 100   |
|                                   | Female | 240          | $\pm$ | 124   | 150       | $\pm$ | 108   | 276       | $\pm$ | 79   | 302          | $\pm$ | 127   | 548       | $\pm$ | 257   | 288       | $\pm$ | 87    |
| Acetamide                         | Male   | 184          | $\pm$ | 65    | 170       | $\pm$ | 40    | 163       | $\pm$ | 37   | 202          | $\pm$ | 59    | 300       | $\pm$ | 77    | 219       | $\pm$ | 62    |
|                                   | Female | 242          | $\pm$ | 123   | 153       | $\pm$ | 150   | 274       | $\pm$ | 53   | 308          | $\pm$ | 124   | 478       | $\pm$ | 332   | 476       | $\pm$ | 240   |
| Acetate                           | Male   | 130          | $\pm$ | 35    | 140       | $\pm$ | 31    | 147       | $\pm$ | 27   | 156          | $\pm$ | 59    | 245       | $\pm$ | 80    | 198       | $\pm$ | 78    |
|                                   | Female | 149          | $\pm$ | 62    | 153       | $\pm$ | 101   | 241       | $\pm$ | 133  | 222          | $\pm$ | 72    | 302       | $\pm$ | 152   | 229       | $\pm$ | 65    |
| Acetoacetate                      | Male   | 112          | $\pm$ | 47    | 106       | $\pm$ | 29    | 91        | $\pm$ | 41   | 162          | $\pm$ | 54    | 196       | $\pm$ | 60    | 132       | $\pm$ | 38    |
|                                   | Female | 101          | $\pm$ | 55    | 71        | $\pm$ | 65    | 84        | $\pm$ | 24   | 159          | $\pm$ | 76    | 270       | $\pm$ | 168   | 239       | $\pm$ | 132   |
| Alanine                           | Male   | 116          | $\pm$ | 32    | 119       | $\pm$ | 39    | 159       | $\pm$ | 130  | 111          | $\pm$ | 38    | 151       | $\pm$ | 44    | 122       | $\pm$ | 52    |
|                                   | Female | 139          | $\pm$ | 74    | 122       | $\pm$ | 77    | 208       | $\pm$ | 48   | 161          | $\pm$ | 39    | 167       | $\pm$ | 41    | 157       | $\pm$ | 30    |
| Allantoin                         | Male   | 13698        | $\pm$ | 4171  | 15919     | $\pm$ | 4556  | 13997     | $\pm$ | 3255 | 15707        | $\pm$ | 4352  | 28751     | $\pm$ | 7242  | 21827     | $\pm$ | 6998  |
|                                   | Female | 23159        | $\pm$ | 10912 | 14062     | $\pm$ | 12885 | 22984     | $\pm$ | 3789 | 25953        | $\pm$ | 11907 | 39857     | $\pm$ | 19455 | 37134     | $\pm$ | 16575 |
| Arabinose                         | Male   | 319          | $\pm$ | 103   | 409       | $\pm$ | 137   | 309       | $\pm$ | 100  | 295          | $\pm$ | 96    | 469       | $\pm$ | 113   | 340       | $\pm$ | 165   |
|                                   | Female | 329          | $\pm$ | 134   | 257       | $\pm$ | 187   | 444       | $\pm$ | 102  | 380          | $\pm$ | 169   | 535       | $\pm$ | 212   | 537       | $\pm$ | 201   |
| Ascorbate                         | Male   | 1624         | $\pm$ | 711   | 1072      | $\pm$ | 836   | 657       | $\pm$ | 457  | 2062         | $\pm$ | 1260  | 1840      | $\pm$ | 1622  | 878       | $\pm$ | 616   |
|                                   | Female | 409          | $\pm$ | 302   | 345       | $\pm$ | 327   | 28        | $\pm$ | 11   | 1058         | $\pm$ | 773   | 1392      | $\pm$ | 1716  | 192       | $\pm$ | 207   |
| Betaine                           | Male   | 176          | $\pm$ | 39    | 127       | $\pm$ | 51    | 140       | $\pm$ | 45   | 135          | $\pm$ | 32    | 148       | $\pm$ | 45    | 128       | $\pm$ | 44    |
|                                   | Female | 322          | $\pm$ | 162   | 267       | $\pm$ | 144   | 367       | $\pm$ | 77   | 413          | $\pm$ | 98    | 615       | $\pm$ | 363   | 353       | $\pm$ | 30    |
| Carnitine                         | Male   | 74           | $\pm$ | 28    | 64        | $\pm$ | 23    | 96        | $\pm$ | 53   | 47           | $\pm$ | 16    | 72        | $\pm$ | 34    | 64        | $\pm$ | 23    |
|                                   | Female | 25           | $\pm$ | 14    | 40        | $\pm$ | 32    | 53        | $\pm$ | 13   | 36           | $\pm$ | 9     | 55        | $\pm$ | 15    | 46        | $\pm$ | 2     |
| Choline                           | Male   | 85           | $\pm$ | 25    | 76        | $\pm$ | 26    | 59        | $\pm$ | 13   | 80           | $\pm$ | 12    | 81        | $\pm$ | 31    | 59        | $\pm$ | 23    |
|                                   | Female | 73           | $\pm$ | 30    | 57        | $\pm$ | 28    | 78        | $\pm$ | 21   | 156          | $\pm$ | 123   | 150       | $\pm$ | 56    | 78        | $\pm$ | 21    |
| Citrate                           | Male   | 436          | $\pm$ | 271   | 1052      | $\pm$ | 3350  | 3888      | $\pm$ | 6018 | 521          | $\pm$ | 476   | 370       | $\pm$ | 361   | 103       | $\pm$ | 30    |
|                                   | Female | 837          | $\pm$ | 946   | 1892      | $\pm$ | 2186  | 2480      | $\pm$ | 1344 | 5635         | $\pm$ | 7160  | 3227      | $\pm$ | 3220  | 471       | $\pm$ | 525   |
| Creatine                          | Male   | 613          | $\pm$ | 444   | 693       | $\pm$ | 462   | 963       | $\pm$ | 936  | 843          | $\pm$ | 368   | 1524      | $\pm$ | 2069  | 238       | $\pm$ | 137   |
|                                   | Female | 1680         | $\pm$ | 1160  | 1239      | $\pm$ | 902   | 1853      | $\pm$ | 683  | 2528         | $\pm$ | 1644  | 4300      | $\pm$ | 3301  | 3596      | $\pm$ | 980   |
| Creatinine                        | Male   | 3392         | $\pm$ | 967   | 3591      | $\pm$ | 876   | 2759      | $\pm$ | 667  | 3295         | $\pm$ | 818   | 4629      | $\pm$ | 1242  | 3438      | $\pm$ | 1151  |
|                                   | Female | 3589         | $\pm$ | 1443  | 2479      | $\pm$ | 1851  | 3798      | $\pm$ | 678  | 3945         | $\pm$ | 1590  | 4873      | $\pm$ | 1544  | 3946      | $\pm$ | 1536  |
| Formate                           | Male   | 130          | $\pm$ | 58    | 280       | $\pm$ | 343   | 89        | $\pm$ | 40   | 78           | $\pm$ | 20    | 123       | $\pm$ | 59    | 103       | $\pm$ | 58    |
|                                   | Female | 113          | $\pm$ | 75    | 144       | $\pm$ | 86    | 157       | $\pm$ | 61   | 133          | $\pm$ | 53    | 154       | $\pm$ | 59    | 111       | $\pm$ | 75    |
| Fucose                            | Male   | 407          | $\pm$ | 126   | 583       | $\pm$ | 137   | 395       | $\pm$ | 111  | 386          | $\pm$ | 113   | 676       | $\pm$ | 185   | 475       | $\pm$ | 173   |
|                                   | Female | 447          | $\pm$ | 203   | 334       | $\pm$ | 279   | 548       | $\pm$ | 107  | 491          | $\pm$ | 242   | 809       | $\pm$ | 329   | 936       | $\pm$ | 498   |

| Metabolite                  | Sex    | Control Diet |   |        |           |   |        |           |   |        | Western Diet |   |        |           |   |        |           |   |       |
|-----------------------------|--------|--------------|---|--------|-----------|---|--------|-----------|---|--------|--------------|---|--------|-----------|---|--------|-----------|---|-------|
|                             |        | 5 months     |   |        | 10 months |   |        | 15 months |   |        | 5 months     |   |        | 10 months |   |        | 15 months |   |       |
| Fumarate                    | Male   | 13           | ± | 3      | 17        | ± | 18     | 14        | ± | 10     | 6            | ± | 2      | 11        | ± | 5      | 10        | ± | 2     |
|                             | Female | 12           | ± | 7      | 15        | ± | 13     | 13        | ± | 6      | 33           | ± | 50     | 22        | ± | 18     | 13        | ± | 3     |
| Glucose                     | Male   | 1613         | ± | 595    | 1380      | ± | 432    | 1180      | ± | 268    | 1071         | ± | 346    | 1440      | ± | 474    | 1016      | ± | 370   |
|                             | Female | 1270         | ± | 632    | 1162      | ± | 847    | 1966      | ± | 477    | 1423         | ± | 407    | 1712      | ± | 652    | 1553      | ± | 391   |
| Glycine                     | Male   | 304          | ± | 106    | 258       | ± | 134    | 233       | ± | 235    | 249          | ± | 109    | 308       | ± | 171    | 119       | ± | 50    |
|                             | Female | 219          | ± | 87     | 89        | ± | 27     | 150       | ± | 71     | 282          | ± | 68     | 280       | ± | 479    | 109       | ± | 30    |
| Guanidoacetate              | Male   | 565          | ± | 189    | 388       | ± | 124    | 317       | ± | 92     | 520          | ± | 159    | 694       | ± | 268    | 389       | ± | 131   |
|                             | Female | 526          | ± | 210    | 381       | ± | 252    | 702       | ± | 186    | 739          | ± | 248    | 893       | ± | 297    | 694       | ± | 317   |
| Hippurate                   | Male   | 317          | ± | 92     | 345       | ± | 86     | 306       | ± | 100    | 681          | ± | 165    | 1030      | ± | 303    | 834       | ± | 238   |
|                             | Female | 611          | ± | 297    | 551       | ± | 384    | 693       | ± | 251    | 1428         | ± | 309    | 1423      | ± | 491    | 1330      | ± | 211   |
| Isobutyrate                 | Male   | 36           | ± | 13     | 41        | ± | 13     | 24        | ± | 13     | 39           | ± | 13     | 55        | ± | 18     | 32        | ± | 12    |
|                             | Female | 36           | ± | 22     | 41        | ± | 39     | 56        | ± | 14     | 45           | ± | 24     | 99        | ± | 39     | 77        | ± | 21    |
| Leucine                     | Male   | 73           | ± | 19     | 49        | ± | 12     | 44        | ± | 25     | 61           | ± | 20     | 50        | ± | 19     | 30        | ± | 11    |
|                             | Female | 55           | ± | 42     | 39        | ± | 22     | 52        | ± | 9      | 52           | ± | 11     | 74        | ± | 22     | 81        | ± | 24    |
| Methylamine                 | Male   | 353          | ± | 115    | 297       | ± | 112    | 230       | ± | 129    | 299          | ± | 77     | 353       | ± | 134    | 225       | ± | 73    |
|                             | Female | 151          | ± | 59     | 86        | ± | 53     | 110       | ± | 34     | 226          | ± | 70     | 219       | ± | 80     | 166       | ± | 38    |
| N,N-Dimethylglycine         | Male   | 27           | ± | 11     | 13        | ± | 9      | 10        | ± | 5      | 25           | ± | 9      | 16        | ± | 9      | 11        | ± | 7     |
|                             | Female | 50           | ± | 29     | 30        | ± | 16     | 28        | ± | 6      | 127          | ± | 38     | 142       | ± | 120    | 44        | ± | 10    |
| N-Carbamoyl-β-alanine       | Male   | 1114         | ± | 575    | 972       | ± | 295    | 1237      | ± | 613    | 1640         | ± | 569    | 3063      | ± | 864    | 2238      | ± | 940   |
|                             | Female | 2522         | ± | 1317   | 1476      | ± | 1134   | 2721      | ± | 789    | 3459         | ± | 957    | 7940      | ± | 4370   | 3904      | ± | 1325  |
| N-Phenylacetylglucine       | Male   | 933          | ± | 257    | 1519      | ± | 463    | 1211      | ± | 702    | 1079         | ± | 305    | 1741      | ± | 656    | 1624      | ± | 683   |
|                             | Female | 1418         | ± | 688    | 934       | ± | 756    | 1507      | ± | 294    | 1841         | ± | 526    | 2195      | ± | 933    | 2199      | ± | 507   |
| Niacinamide                 | Male   | 125          | ± | 54     | 154       | ± | 38     | 114       | ± | 50     | 114          | ± | 31     | 131       | ± | 43     | 63        | ± | 34    |
|                             | Female | 156          | ± | 51     | 166       | ± | 70     | 210       | ± | 50     | 276          | ± | 46     | 136       | ± | 90     | 116       | ± | 60    |
| Nicotinamide N-oxide        | Male   | 243          | ± | 116    | 425       | ± | 123    | 319       | ± | 139    | 453          | ± | 189    | 818       | ± | 193    | 462       | ± | 225   |
|                             | Female | 303          | ± | 120    | 216       | ± | 148    | 448       | ± | 110    | 684          | ± | 182    | 430       | ± | 247    | 658       | ± | 152   |
| Pantothenate                | Male   | 360          | ± | 107    | 339       | ± | 101    | 338       | ± | 88     | 258          | ± | 83     | 369       | ± | 125    | 285       | ± | 97    |
|                             | Female | 199          | ± | 96     | 309       | ± | 222    | 377       | ± | 68     | 318          | ± | 122    | 282       | ± | 190    | 286       | ± | 121   |
| Pseudouridine               | Male   | 255          | ± | 77     | 270       | ± | 75     | 217       | ± | 51     | 264          | ± | 63     | 441       | ± | 114    | 320       | ± | 104   |
|                             | Female | 354          | ± | 153    | 211       | ± | 173    | 339       | ± | 68     | 424          | ± | 174    | 556       | ± | 218    | 511       | ± | 211   |
| Succinate                   | Male   | 95           | ± | 38     | 150       | ± | 196    | 267       | ± | 277    | 119          | ± | 42     | 148       | ± | 68     | 99        | ± | 31    |
|                             | Female | 144          | ± | 66     | 183       | ± | 135    | 196       | ± | 56     | 347          | ± | 245    | 432       | ± | 99     | 165       | ± | 20    |
| Sucrose                     | Male   | 1004         | ± | 605    | 759       | ± | 241    | 846       | ± | 188    | 2210         | ± | 558    | 2863      | ± | 1545   | 2011      | ± | 1304  |
|                             | Female | 646          | ± | 366    | 971       | ± | 861    | 1127      | ± | 320    | 3147         | ± | 1362   | 3441      | ± | 3061   | 1856      | ± | 1176  |
| Tartrate                    | Male   | 61           | ± | 19     | 86        | ± | 24     | 63        | ± | 39     | 69           | ± | 26     | 162       | ± | 50     | 109       | ± | 39    |
|                             | Female | 40           | ± | 17     | 39        | ± | 27     | 57        | ± | 13     | 47           | ± | 19     | 86        | ± | 24     | 97        | ± | 33    |
| Taurine                     | Male   | 20743        | ± | 9142   | 21846     | ± | 6343   | 20365     | ± | 6266   | 14237        | ± | 4245   | 27112     | ± | 11644  | 18573     | ± | 8436  |
|                             | Female | 16798        | ± | 7525   | 9747      | ± | 7219   | 17059     | ± | 6143   | 24976        | ± | 6914   | 20336     | ± | 7141   | 10466     | ± | 4104  |
| Trimethylamine              | Male   | 13119        | ± | 3300   | 13823     | ± | 2701   | 10554     | ± | 3862   | 2786         | ± | 788    | 2990      | ± | 1348   | 3028      | ± | 1326  |
|                             | Female | 1706         | ± | 1342   | 1730      | ± | 1274   | 4212      | ± | 1378   | 724          | ± | 329    | 1267      | ± | 908    | 2827      | ± | 2291  |
| Trimethylamine N-oxide      | Male   | 1370         | ± | 408    | 1812      | ± | 286    | 1764      | ± | 399    | 519          | ± | 138    | 768       | ± | 212    | 762       | ± | 292   |
|                             | Female | 8359         | ± | 3163   | 7739      | ± | 4473   | 8548      | ± | 1581   | 2204         | ± | 795    | 1222      | ± | 602    | 1114      | ± | 754   |
| Uracil                      | Male   | 76           | ± | 22     | 69        | ± | 19     | 41        | ± | 13     | 66           | ± | 20     | 70        | ± | 26     | 57        | ± | 52    |
|                             | Female | 92           | ± | 43     | 35        | ± | 18     | 79        | ± | 21     | 106          | ± | 49     | 154       | ± | 76     | 93        | ± | 41    |
| Urea                        | Male   | 392082       | ± | 131041 | 300397    | ± | 73851  | 375438    | ± | 81369  | 360902       | ± | 64393  | 423164    | ± | 124950 | 308331    | ± | 80170 |
|                             | Female | 368292       | ± | 143589 | 408250    | ± | 193902 | 499097    | ± | 127635 | 519753       | ± | 152073 | 440133    | ± | 198278 | 325254    | ± | 32316 |
| Valine                      | Male   | 53           | ± | 13     | 44        | ± | 9      | 58        | ± | 73     | 43           | ± | 13     | 45        | ± | 11     | 30        | ± | 9     |
|                             | Female | 56           | ± | 31     | 48        | ± | 22     | 67        | ± | 14     | 75           | ± | 15     | 114       | ± | 49     | 63        | ± | 6     |
| cis-Aconitate               | Male   | 841          | ± | 238    | 862       | ± | 742    | 1173      | ± | 466    | 814          | ± | 236    | 1095      | ± | 454    | 594       | ± | 131   |
|                             | Female | 1257         | ± | 524    | 1671      | ± | 1176   | 2128      | ± | 402    | 2422         | ± | 918    | 2767      | ± | 812    | 1242      | ± | 249   |
| sn-Glycero-3-phosphocholine | Male   | 118          | ± | 31     | 122       | ± | 36     | 139       | ± | 103    | 87           | ± | 27     | 134       | ± | 58     | 103       | ± | 34    |
|                             | Female | 75           | ± | 35     | 69        | ± | 48     | 127       | ± | 32     | 92           | ± | 41     | 176       | ± | 98     | 153       | ± | 44    |
| trans-Aconitate             | Male   | 120          | ± | 46     | 111       | ± | 38     | 154       | ± | 71     | 118          | ± | 88     | 141       | ± | 49     | 136       | ± | 56    |
|                             | Female | 122          | ± | 99     | 119       | ± | 120    | 282       | ± | 202    | 179          | ± | 84     | 167       | ± | 83     | 149       | ± | 39    |



**Supplementary Table 5.** Summary of multivariate response linear regression analysis on the balance of microbial communities. The effect of covariates, diet and sex, on the microbiome of fecal and cecal samples collected at 5, 10 and 15 months were evaluated separately using Gneiss. To estimate the effect of a single covariate, a leave-one-variable-out approach was used and the results reported as R<sup>2</sup>diff.

|              | <b>Age</b> | <b>Diet (R<sup>2</sup>diff)</b> | <b>Sex (R<sup>2</sup>diff)</b> | <b>R<sup>2</sup></b> |
|--------------|------------|---------------------------------|--------------------------------|----------------------|
| <b>Fecal</b> | 5          | 0.0899                          | 0.204                          | 0.294                |
|              | 10         | 0.0863                          | 0.147                          | 0.233                |
|              | 15         | 0.0747                          | 0.254                          | 0.335                |
| <b>Cecal</b> | 5          | 0.110                           | 0.178                          | 0.288                |
|              | 10         | 0.0851                          | 0.144                          | 0.229                |
|              | 15         | 0.119                           | 0.246                          | 0.379                |

**Supplementary Table 6.** Fecal microbes significantly different in abundance between male and female mice accounting for diet. Differential abundance analysis was performed using gneiss, in combination with OLS regression models to identify taxa significantly different between groups.

|                            | 5 months                     | 10 months                  | 15 months                  |
|----------------------------|------------------------------|----------------------------|----------------------------|
| <b>Phylum</b>              | <i>Actinobacteria</i>        | <i>Actinobacteria</i>      | <i>Actinobacteria</i>      |
|                            | <i>Bacteroidetes</i>         | <i>Bacteroidetes</i>       | <i>Bacteroidetes</i>       |
|                            | <i>Firmicutes</i>            | <i>Firmicutes</i>          | <i>Firmicutes</i>          |
|                            | <i>Proteobacteria</i>        | <i>Proteobacteria</i>      | <i>Proteobacteria</i>      |
|                            | <i>Tenericutes</i>           |                            |                            |
|                            | <i>Verrucomicrobia</i>       |                            |                            |
| <b>Family</b>              | <i>Alcaligenaceae</i>        | S24-7                      | S24-7                      |
|                            | <i>Bacteroidaceae</i>        | <i>Bacteroidaceae</i>      | <i>Bifidobacteriaceae</i>  |
|                            | <i>Bifidobacteriaceae</i>    | <i>Clostridiaceae</i>      | <i>Clostridiaceae</i>      |
|                            | <i>Christensenellaceae</i>   | <i>Coriobacteriaceae</i>   | <i>Coriobacteriaceae</i>   |
|                            | <i>Clostridiaceae</i>        | <i>Desulfovibrionaceae</i> | <i>Dehalobacteriaceae</i>  |
|                            | <i>Coriobacteriaceae</i>     | <i>Erysipelotrichaceae</i> | <i>Desulfovibrionaceae</i> |
|                            | <i>Dehalobacteriaceae</i>    | <i>Helicobacteraceae</i>   | <i>Erysipelotrichaceae</i> |
|                            | <i>Erysipelotrichaceae</i>   | <i>Lachnospiraceae</i>     | <i>Helicobacteraceae</i>   |
|                            | S24-7                        | <i>Lactobacillaceae</i>    | <i>Lachnospiraceae</i>     |
|                            | <i>Lachnospiraceae</i>       | <i>Rikenellaceae</i>       | <i>Lactobacillaceae</i>    |
|                            | <i>Lactobacillaceae</i>      | <i>Ruminococcaceae</i>     | <i>Mogibacteriaceae</i>    |
|                            | <i>Mogibacteriaceae</i>      | <i>Streptococcaceae</i>    | <i>Porphyromonadaceae</i>  |
|                            | <i>Peptostreptococcaceae</i> | <i>Turicibacteraceae</i>   | <i>Rikenellaceae</i>       |
|                            | <i>Rikenellaceae</i>         | <i>Verrucomicrobiaceae</i> | <i>Ruminococcaceae</i>     |
|                            | <i>Ruminococcaceae</i>       |                            | <i>Verrucomicrobiaceae</i> |
| <i>Verrucomicrobiaceae</i> |                              |                            |                            |
| <b>Genus</b>               | <i>Adlercreutzia</i>         | <i>Akkermansia</i>         | AF12                       |
|                            | AF12                         | <i>Bacteroides</i>         | <i>Akkermansia</i>         |
|                            | <i>Akkermansia</i>           | <i>Bilophila</i>           | <i>Allobaculum</i>         |
|                            | <i>Allobaculum</i>           | <i>Coprococcus</i>         | <i>Bifidobacterium</i>     |
|                            | <i>Anaerotruncus</i>         | <i>Helicobacter</i>        | <i>Coprococcus</i>         |
|                            | <i>Bacteroides</i>           | <i>Lactobacillus</i>       | <i>Dehalobacterium</i>     |
|                            | <i>Bifidobacterium</i>       | <i>Lactococcus</i>         | <i>Helicobacter</i>        |
|                            | <i>Blautia</i>               | <i>Oscillospira</i>        | <i>Lactobacillus</i>       |
|                            | <i>Coprococcus</i>           | <i>Ruminococcus</i>        | <i>Oscillospira</i>        |
|                            | <i>Dehalobacterium</i>       | <i>Turicibacter</i>        | <i>Parabacteroides</i>     |
|                            | <i>Dorea</i>                 |                            | <i>Roseburia</i>           |
|                            | <i>Eubacterium</i>           |                            | <i>Ruminococcus</i>        |
|                            | <i>Lactobacillus</i>         |                            |                            |
|                            | <i>Oscillospira</i>          |                            |                            |
|                            | <i>Ruminococcus</i>          |                            |                            |
|                            | <i>Sutterella</i>            |                            |                            |

**Supplementary Table 7.** Fecal microbes significantly in abundance between CD and WD accounting for sex. Differential abundance analysis was performed using gneiss, in combination with OLS regression models to identify taxa significantly different between groups.

|                            | 5 months                     | 10 months                  | 15 months                  |
|----------------------------|------------------------------|----------------------------|----------------------------|
| <b>Phylum</b>              | <i>Actinobacteria</i>        | <i>Actinobacteria</i>      | <i>Bacteroidetes</i>       |
|                            | <i>Bacteroidetes</i>         | <i>Bacteroidetes</i>       | <i>Firmicutes</i>          |
|                            | <i>Firmicutes</i>            | <i>Firmicutes</i>          | <i>Verrucomicrobia</i>     |
|                            | <i>Proteobacteria</i>        | <i>Tenericutes</i>         |                            |
|                            | <i>Tenericutes</i>           |                            |                            |
|                            | <i>Verrucomicrobia</i>       |                            |                            |
| <b>Family</b>              | <i>Alcaligenaceae</i>        | <i>Clostridiaceae</i>      | <i>Erysipelotrichaceae</i> |
|                            | <i>Anaeroplasmataceae</i>    | <i>Coriobacteriaceae</i>   | <i>Lachnospiraceae</i>     |
|                            | <i>Bacteroidaceae</i>        | <i>Erysipelotrichaceae</i> | <i>Mogibacteriaceae</i>    |
|                            | <i>Bifidobacteriaceae</i>    | <i>Lachnospiraceae</i>     | <i>Peptococcaceae</i>      |
|                            | <i>Christensenellaceae</i>   | <i>Peptococcaceae</i>      | <i>Porphyromonadaceae</i>  |
|                            | <i>Clostridiaceae</i>        | <i>Ruminococcaceae</i>     | <i>Ruminococcaceae</i>     |
|                            | <i>Coriobacteriaceae</i>     | <i>Ruminococcaceae</i>     | <i>S24-7</i>               |
|                            | <i>Desulfovibrionaceae</i>   | <i>S24-7</i>               | <i>Verrucomicrobiaceae</i> |
|                            | <i>Enterococcaceae</i>       | <i>Staphylococcaceae</i>   |                            |
|                            | <i>Erysipelotrichaceae</i>   | <i>Streptococcaceae</i>    |                            |
|                            | <i>f-S24-7</i>               | <i>Turicibacteraceae</i>   |                            |
|                            | <i>Lachnospiraceae</i>       |                            |                            |
|                            | <i>Lactobacillaceae</i>      |                            |                            |
|                            | <i>Mogibacteriaceae</i>      |                            |                            |
|                            | <i>Peptostreptococcaceae</i> |                            |                            |
|                            | <i>Rikenellaceae</i>         |                            |                            |
|                            | <i>Ruminococcaceae</i>       |                            |                            |
| <i>Streptococcaceae</i>    |                              |                            |                            |
| <i>Verrucomicrobiaceae</i> |                              |                            |                            |
| <b>Genus</b>               | <i>Akkermansia</i>           | <i>Sutterella</i>          | <i>Akkermansia</i>         |
|                            | <i>Allobaculum</i>           | <i>Adlercreutzia</i>       | <i>Oscillospira</i>        |
|                            | <i>Anaeroplasma</i>          | <i>Allobaculum</i>         | <i>Parabacteroides</i>     |
|                            | <i>Anaerotruncus</i>         | <i>Coprococcus</i>         | <i>Roseburia</i>           |
|                            | <i>Bacteroides</i>           | <i>Lactococcus</i>         |                            |
|                            | <i>Bifidobacterium</i>       | <i>Oscillospira</i>        |                            |
|                            | <i>Clostridium</i>           | <i>Roseburia</i>           |                            |
|                            | <i>Coprobacillus</i>         | <i>Ruminococcus</i>        |                            |
|                            | <i>Coprococcus</i>           | <i>Staphylococcus</i>      |                            |
|                            | <i>Enterococcus</i>          | <i>Turicibacter</i>        |                            |
|                            | <i>Eubacterium</i>           |                            |                            |
|                            | <i>Lactobacillus</i>         |                            |                            |
|                            | <i>Lactococcus</i>           |                            |                            |
|                            | <i>Oscillospira</i>          |                            |                            |
|                            | <i>Ruminococcus</i>          |                            |                            |
| <i>Sutterella</i>          |                              |                            |                            |

**Supplementary Table 8.** Cecal microbes identified as significantly different in abundance between male and female mice accounting for diet. Differential abundance analysis was performed using gneiss, in combination with ordinary least squares (OLS) regression models to identify taxa significantly different between groups.

|               | 5 months                     | 10 months                  | 15 months                    |
|---------------|------------------------------|----------------------------|------------------------------|
| <b>Phylum</b> | <i>Bacteroidetes</i>         | <i>Actinobacteria</i>      | <i>Actinobacteria</i>        |
|               | <i>Firmicutes</i>            | <i>Bacteroidetes</i>       | <i>Bacteroidetes</i>         |
|               | <i>Proteobacteria</i>        | <i>Firmicutes</i>          | <i>Deferribacteres</i>       |
|               | <i>Tenericutes</i>           | <i>Proteobacteria</i>      | <i>Firmicutes</i>            |
|               |                              | <i>Tenericutes</i>         | <i>Proteobacteria</i>        |
|               |                              |                            | <i>Tenericutes</i>           |
|               |                              |                            | <i>Verrucomicrobia</i>       |
| <b>Family</b> | <i>Alcaligenaceae</i>        | <i>Christensenellaceae</i> | <i>S24-7</i>                 |
|               | <i>Bacteroidaceae</i>        | <i>Clostridiaceae</i>      | <i>Anaeroplasmataceae</i>    |
|               | <i>Christensenellaceae</i>   | <i>Coriobacteriaceae</i>   | <i>Bacteroidaceae</i>        |
|               | <i>Clostridiaceae</i>        | <i>Dehalobacteriaceae</i>  | <i>Bifidobacteriaceae</i>    |
|               | <i>Dehalobacteriaceae</i>    | <i>Desulfovibrionaceae</i> | <i>Christensenellaceae</i>   |
|               | <i>Desulfovibrionaceae</i>   | <i>Erysipelotrichaceae</i> | <i>Clostridiaceae</i>        |
|               | <i>Enterococcaceae</i>       | <i>Helicobacteraceae</i>   | <i>Coriobacteriaceae</i>     |
|               | <i>Erysipelotrichaceae</i>   | <i>Lachnospiraceae</i>     | <i>Deferribacteraceae</i>    |
|               | <i>Lachnospiraceae</i>       | <i>Lactobacillaceae</i>    | <i>Desulfovibrionaceae</i>   |
|               | <i>Lactobacillaceae</i>      | <i>Mogibacteriaceae</i>    | <i>Erysipelotrichaceae</i>   |
|               | <i>Peptostreptococcaceae</i> | <i>Rikenellaceae</i>       | <i>Lachnospiraceae</i>       |
|               | <i>Rikenellaceae</i>         | <i>Ruminococcaceae</i>     | <i>Lactobacillaceae</i>      |
|               | <i>Ruminococcaceae</i>       | <i>S24-7</i>               | <i>Peptostreptococcaceae</i> |
|               | <i>S24-7</i>                 | <i>Streptococcaceae</i>    | <i>Rikenellaceae</i>         |
|               |                              |                            | <i>Ruminococcaceae</i>       |
|               |                              |                            | <i>Streptococcaceae</i>      |
|               |                              | <i>Turicibacteraceae</i>   |                              |
|               |                              | <i>Verrucomicrobiaceae</i> |                              |
| <b>Genus</b>  | <i>Bacteroides</i>           | <i>Bilophila</i>           | <i>Akkermansia</i>           |
|               | <i>Coprococcus</i>           | <i>Coprococcus</i>         | <i>Allobaculum</i>           |
|               | <i>Dehalobacterium</i>       | <i>Dehalobacterium</i>     | <i>Anaeroplasma</i>          |
|               | <i>Desulfovibrio</i>         | <i>Dorea</i>               | <i>Anaerotruncus</i>         |
|               | <i>Dorea</i>                 | <i>Helicobacter</i>        | <i>Bacteroides</i>           |
|               | <i>Enterococcus</i>          | <i>Lactobacillus</i>       | <i>Bifidobacterium</i>       |
|               | <i>Lactobacillus</i>         | <i>Lactococcus</i>         | <i>Coprococcus</i>           |
|               | <i>Oscillospira</i>          | <i>Oscillospira</i>        | <i>Desulfovibrio</i>         |
|               | <i>Ruminococcus</i>          | <i>Roseburia</i>           | <i>Dorea</i>                 |
|               | <i>Sutterella</i>            | <i>Ruminococcus</i>        | <i>Lactobacillus</i>         |
|               |                              |                            | <i>Lactococcus</i>           |
|               |                              |                            | <i>Mucispirillum</i>         |
|               |                              |                            | <i>Oscillospira</i>          |
|               |                              |                            | <i>Roseburia</i>             |
|               |                              |                            | <i>Ruminococcus</i>          |
|               |                              | <i>Turicibacter</i>        |                              |

**Supplementary Table 9.** Cecal microbes significantly in abundance between CD and WD accounting for sex. Differential abundance analysis was performed using gneiss, in combination with OLS regression models to identify taxa significantly different between groups.

|               | 5 months                     | 10 months                  | 15 months                    |
|---------------|------------------------------|----------------------------|------------------------------|
| <b>Phylum</b> | <i>Bacteroidetes</i>         | <i>Bacteroidetes</i>       | <i>Actinobacteria</i>        |
|               | <i>Firmicutes</i>            | <i>Firmicutes</i>          | <i>Bacteroidetes</i>         |
|               | <i>Tenericutes</i>           | <i>Proteobacteria</i>      | <i>Deferribacteres</i>       |
|               |                              | <i>Tenericutes</i>         | <i>Firmicutes</i>            |
|               |                              |                            | <i>Proteobacteria</i>        |
| <b>Family</b> | <i>Bacteroidaceae</i>        | <i>Clostridiaceae</i>      | <i>Anaeroplasmataceae</i>    |
|               | <i>Christensenellaceae</i>   | <i>Desulfovibrionaceae</i> | <i>Bacteroidaceae</i>        |
|               | <i>Dehalobacteriaceae</i>    | <i>Erysipelotrichaceae</i> | <i>Bifidobacteriaceae</i>    |
|               | <i>Erysipelotrichaceae</i>   | <i>Lachnospiraceae</i>     | <i>Christensenellaceae</i>   |
|               | <i>Lachnospiraceae</i>       | <i>Lactobacillaceae</i>    | <i>Clostridiaceae</i>        |
|               | <i>Mogibacteriaceae</i>      | <i>Mogibacteriaceae</i>    | <i>Deferribacteraceae</i>    |
|               | <i>Peptostreptococcaceae</i> | <i>Rikenellaceae</i>       | <i>Desulfovibrionaceae</i>   |
|               | <i>Ruminococcaceae</i>       | <i>Ruminococcaceae</i>     | <i>Helicobacteraceae</i>     |
|               | <i>S24-7</i>                 | <i>S24-7</i>               | <i>Lachnospiraceae</i>       |
|               | <i>Streptococcaceae</i>      | <i>Streptococcaceae</i>    | <i>Lactobacillaceae</i>      |
|               |                              |                            | <i>Odoribacteraceae</i>      |
|               |                              |                            | <i>Peptostreptococcaceae</i> |
|               |                              |                            | <i>Porphyromonadaceae</i>    |
|               |                              |                            | <i>Rikenellaceae</i>         |
|               |                              |                            | <i>Ruminococcaceae</i>       |
|               |                              | <i>S24-7</i>               |                              |
|               |                              | <i>Streptococcaceae</i>    |                              |
|               |                              | <i>Turicibacteraceae</i>   |                              |
| <b>Genus</b>  | <i>Allobaculum</i>           | <i>Allobaculum</i>         | <i>Allobaculum</i>           |
|               | <i>Bacteroides</i>           | <i>Bilophila</i>           | <i>Anaeroplasma</i>          |
|               | <i>Coprococcus</i>           | <i>Coprococcus</i>         | <i>Anaerotruncus</i>         |
|               | <i>Dehalobacterium</i>       | <i>Dorea</i>               | <i>Bacteroides</i>           |
|               | <i>Dorea</i>                 | <i>Lactobacillus</i>       | <i>Bifidobacterium</i>       |
|               | <i>Oscillospira</i>          | <i>Lactococcus</i>         | <i>Coprococcus</i>           |
|               | <i>Ruminococcus</i>          | <i>Oscillospira</i>        | <i>Desulfovibrio</i>         |
|               | <i>Streptococcus</i>         | <i>Roseburia</i>           | <i>Dorea</i>                 |
|               |                              | <i>Ruminococcus</i>        | <i>Helicobacter</i>          |
|               |                              |                            | <i>Lactobacillus</i>         |
|               |                              |                            | <i>Lactococcus</i>           |
|               |                              |                            | <i>Mucispirillum</i>         |
|               |                              |                            | <i>Odoribacter</i>           |
|               |                              |                            | <i>Oscillospira</i>          |
|               |                              |                            | <i>Parabacteroides</i>       |
|               |                              | <i>Ruminococcus</i>        |                              |
|               |                              | <i>Turicibacter</i>        |                              |

**Supplementary Table 10.** The nutritional composition of the diets used in this study. The control diet provides 3.6 kcal/g and the Western diet 4.5 kcal/g. The information was obtained from the ENVIGO Teklad Diets website (<https://www.envigo.com>).

| <b>Component</b>    | <b>CD</b>          |                    | <b>WD</b>          |                    |
|---------------------|--------------------|--------------------|--------------------|--------------------|
|                     | <b>% by weight</b> | <b>% kcal from</b> | <b>% by weight</b> | <b>% kcal from</b> |
| <b>Protein</b>      | 17.3               | 19.1               | 17.3               | 15.2               |
| <b>Carbohydrate</b> | 61.3               | 67.9               | 48.5               | 42.7               |
| <b>Fat</b>          | 5.2                | 13                 | 21.2               | 42                 |

**Supplementary Table 11.** Formula of the diets used in this study. The control diet (TD.08485) is different from Western diet (TD.88137) with the lower fat and sucrose, and no cholesterol. The information was obtained from the ENVIGO Teklad Diets website (<https://www.envigo.com>).

| <b>Ingredient</b>            | <b>CD (g/kg)</b> | <b>WD (g/kg)</b> |
|------------------------------|------------------|------------------|
| Casein                       | 195              | 195              |
| DL-Methionine                | 3                | 3                |
| Sucrose                      | 120              | 341.46           |
| Corn Starch                  | 432.99           | 150              |
| Maltodextrin                 | 100              | 0                |
| Anhydrous Milkfat            | 37.20            | 210              |
| Soybean Oil                  | 12.80            | 0                |
| Cholesterol                  | 0                | 1.50             |
| Cellulose                    | 50               | 50               |
| Mineral Mix, AIN-76 (170915) | 35               | 35               |
| Calcium Carbonate            | 4                | 4                |
| Vitamin Mix, Teklad (40060)  | 10               | 10               |
| Ethoxyquin, antioxidant      | 0.010            | 0.040            |

**Supplementary Table 12.** The fatty acid (FA) composition of the diets used in this study. 3.7% of total fat comes from milk fat and 1.3% from soybean oil in CD, whereas milk fat is the only fat source in WD. The information was obtained from the ENVIGO Teklad Diets website (<https://www.envigo.com>) and USDA National Nutrient Databases.

| Category                   | FA                     | CD (g/kg product)                          | WD (g/kg product)                    |
|----------------------------|------------------------|--------------------------------------------|--------------------------------------|
| <b>Saturated FAs</b>       | Palmitic acid (C16:0)  | 11.2<br>[9.86 (milk fat) + 1.34 (soy oil)] | 55.7 (milk fat)                      |
|                            | Stearic acid (C18:0)   | 4.33<br>[3.76 (milk fat) + 0.57 (soy oil)] | 21.2 (milk fat)                      |
| <b>Monounsaturated FAs</b> | Oleic acid (C18:1)     | 9.57<br>[6.68 (milk fat) + 2.89 (soy oil)] | 37.7 (milk fat)                      |
| <b>Polyunsaturated FAs</b> | Linoleic acid (C18:2)  | 6.81<br>[0.36 (milk fat) + 6.45 (soy oil)] | 2.01 (milk fat)                      |
|                            | Linolenic acid (C18:3) | 1<br>[0.13 (milk fat) + 0.87 (soy oil)]    | 0.72 (milk fat)                      |
| <b>Trans FAs</b>           | NA                     | 1.75<br>[1.75 (milk fat) + 0 (soy oil)]    | 9.87 (milk fat)                      |
| <b>Cholesterol</b>         | NA                     | 0.089<br>[0.089 (milk fat) + 0 (soy oil)]  | 2<br>[0.50 (milk fat) + 1.5 (added)] |



**Supplementary Table 13.** Sample sizes for serum, urine, cecal and fecal samples.

|                  |                   | Male <sup>1</sup>  |                    |                    |                             | Female <sup>1</sup> |                    |                    |                             |
|------------------|-------------------|--------------------|--------------------|--------------------|-----------------------------|---------------------|--------------------|--------------------|-----------------------------|
| Age <sup>1</sup> | Diet <sup>1</sup> | Feces <sup>2</sup> | Urine <sup>3</sup> | Serum <sup>4</sup> | Cecal contents <sup>5</sup> | Feces <sup>2</sup>  | Urine <sup>3</sup> | Serum <sup>4</sup> | Cecal contents <sup>5</sup> |
| 5                | Control           | 20                 | 19                 | 14                 | 16                          | 20                  | 19                 | 4                  | 6                           |
|                  | Western           | 18                 | 18                 | 13                 | 16                          | 19                  | 7                  | 6                  | 6                           |
| 10               | Control           | 15                 | 8                  | 9                  | 16                          | 16                  | 6                  | 8                  | 6                           |
|                  | Western           | 16                 | 15                 | 12                 | 16                          | 16                  | 6                  | 5                  | 6                           |
| 15               | Control           | 8                  | 6                  | 8                  | 8                           | 7                   | 8                  | 6                  | 8                           |
|                  | Western           | 8                  | 6                  | 8                  | 8                           | 3                   | 3                  | 3                  | 3                           |

<sup>1</sup>Total number of mice per group was 20, for a total of 120 mice at the beginning of the experiment. Over time, several of the male and female mice (particularly female mice on the WD) developed ulcerative dermatitis, and for humane reasons needed to be euthanized and removed from the study.

<sup>2</sup>Fecal samples were collected after handling of animals immediately prior to necropsy. The number of samples reflects the number of animals at the specific timepoint and diet that produced a sample.

<sup>3</sup>Urine samples were collected after handling of animals immediately prior to necropsy through bladder massage. The number of samples reflects the number of animals at the specific timepoint and diet that produced a sample of enough volume to analyze.

<sup>4</sup>Serum samples were collected at necropsy through cardiac puncture. In some cases, not enough serum was collected to perform metabolomics analysis.

<sup>5</sup>Cecal content was collected at necropsy. In some cases there was not enough cecal content to perform 16S sequencing.

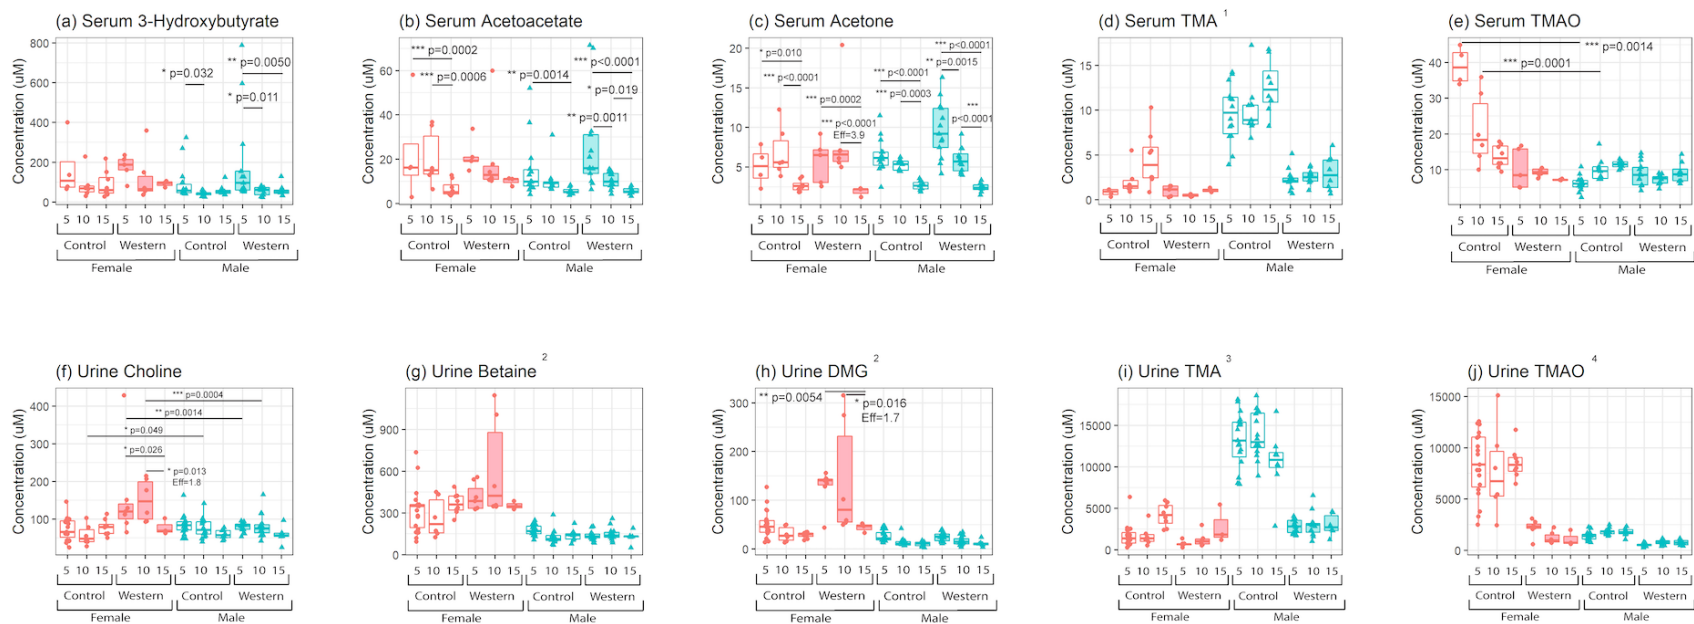

**Supplementary Figure 1.** Boxplots showing concentrations of either serum or urine metabolites. After fitting a linear model, estimated marginal means (EMMs) were obtained and compared as a post-hoc test ( $p < 0.05$  were included in the plots). Effect size for female samples at 15 months of age are included. The middle line in the box plot represents the median. Female samples are shown as red circles and male as blue triangles. Mice on the CD are represented with empty boxes and WD with filled boxes. (a) Serum 3-Hydroxybutyrate; (b) serum acetoacetate; (c) serum acetone; (d) serum TMA; (e) serum TMAO; (f) urinary choline; (g) urinary betaine; (h) urinary DMG; (i) urinary TMA; (j) urinary TMAO. \*:  $p < 0.05$ ; \*\*:  $p < 0.01$ ; \*\*\*:  $p < 0.001$ .

<sup>1</sup> Male mice showed significantly higher concentration than female mice regardless of age and diet.

<sup>2</sup> Female mice showed significantly higher concentration than male mice regardless of age and diet.

<sup>3</sup> Male mice showed significantly higher concentration than female mice regardless of age and diet, except for mice on the WD at 15 months of age ( $p > 0.05$ ).

<sup>4</sup> Female mice showed significantly higher concentration than male mice regardless of age and diet, except for mice on the WD at 15 months of age ( $p > 0.05$ ).

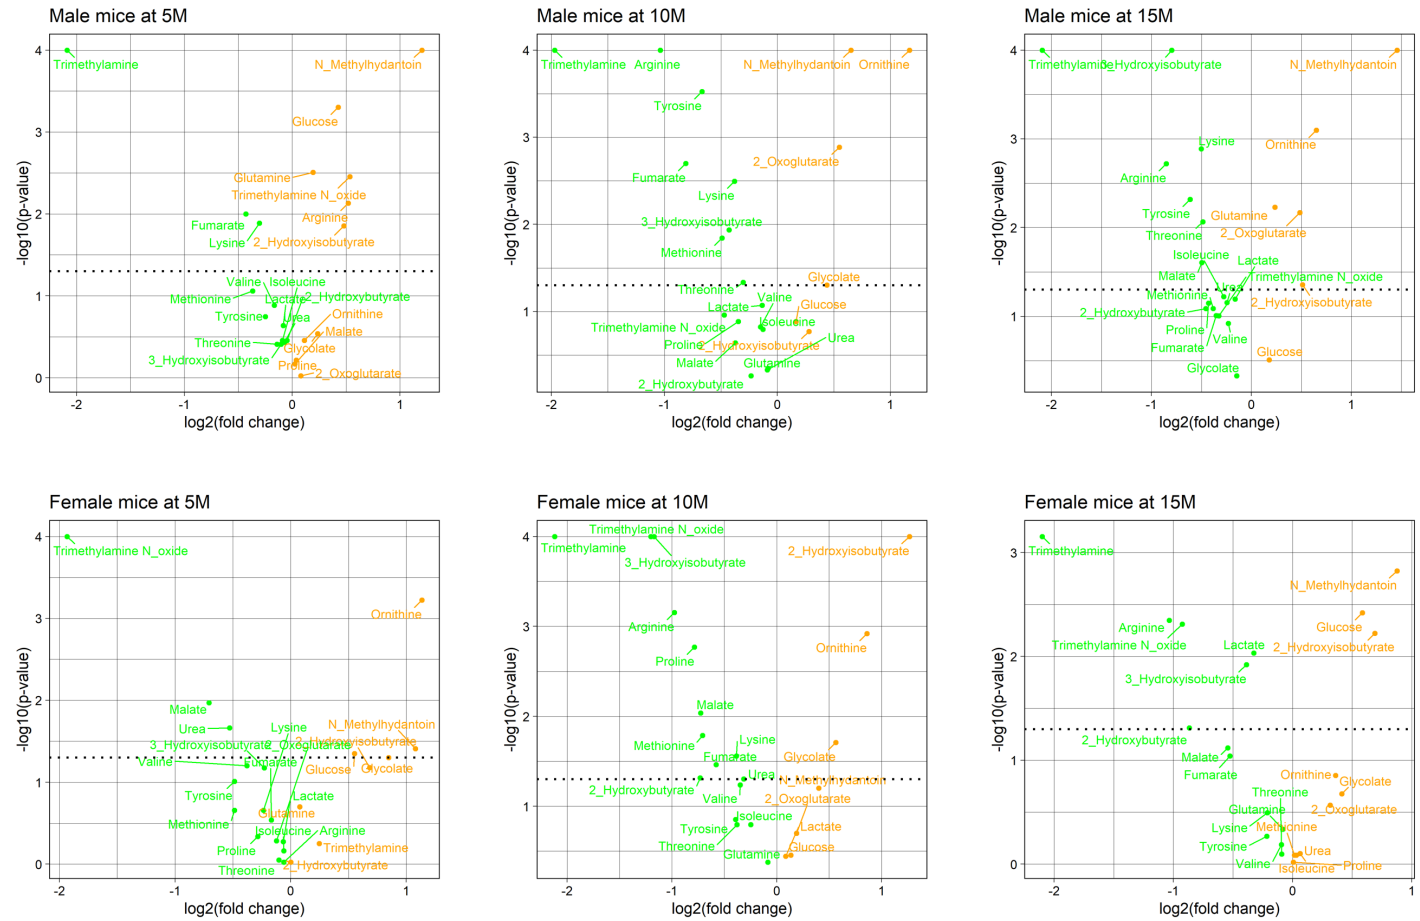

**Supplementary Figure 2.** Volcano plots showing the difference in the serum metabolome between CD and WD for male and female mice. Among 23 serum metabolites that showed significant impact of diet in Supplementary Table 1, a post-hoc test was applied to test the impact of diet at each age for male and female mice separately. Metabolites with higher levels in the WD group are indicated in orange, whereas those with higher levels in the CD group are indicated in green. Metabolites above the dotted line correspond to those with a  $p$ -value  $< 0.05$ .

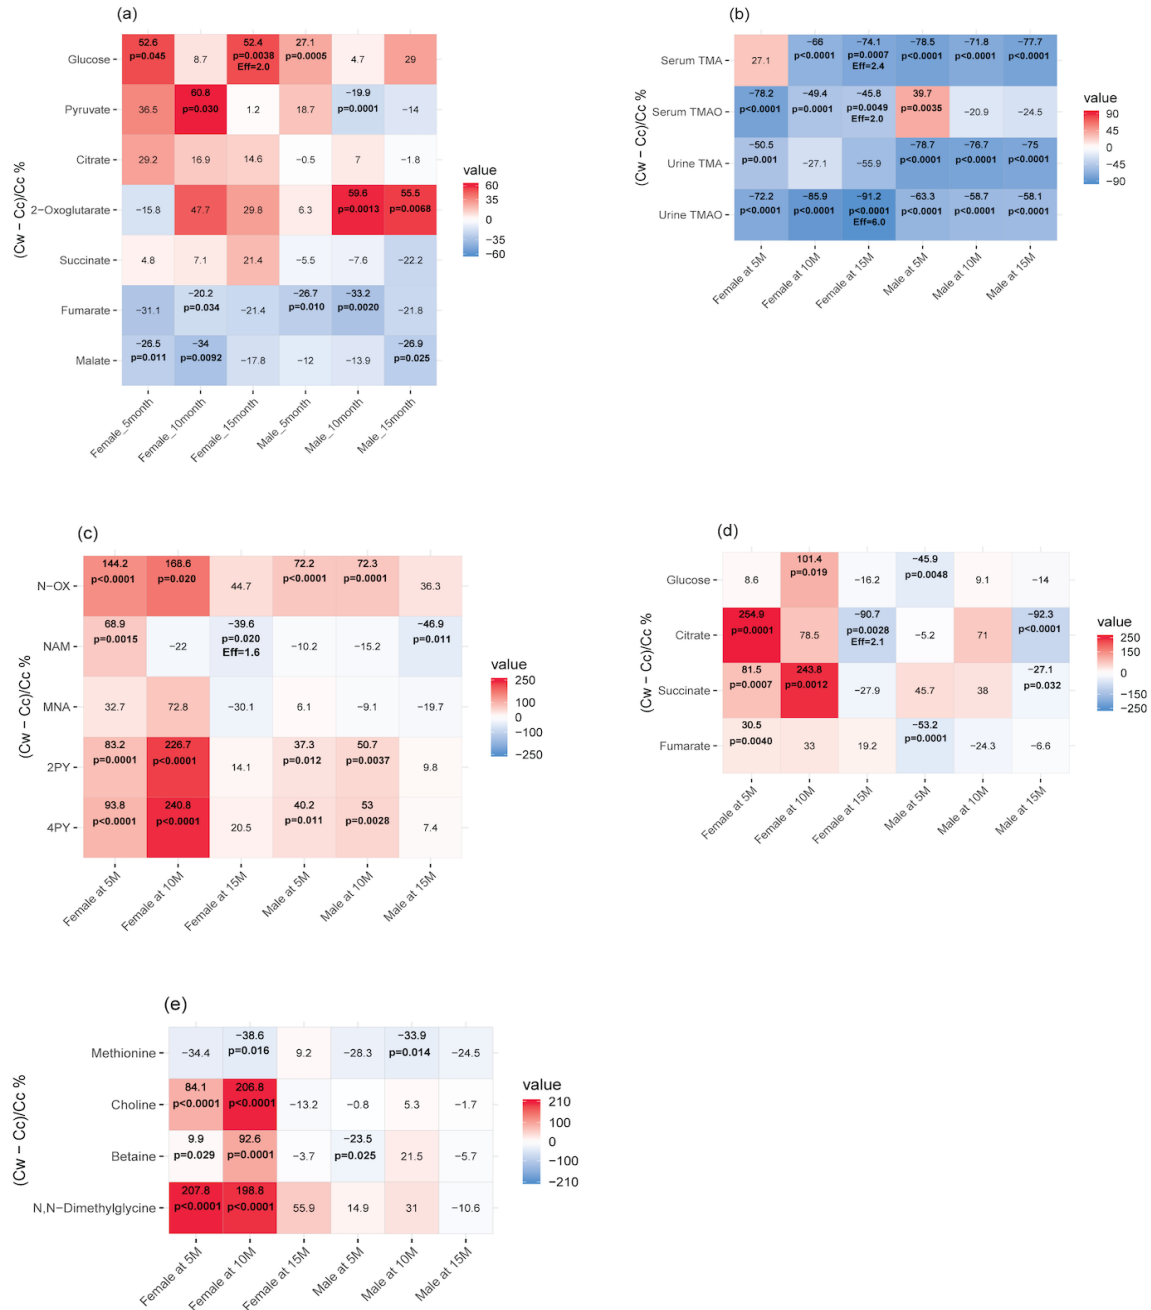

**Supplementary Figure 3.** Heatmaps showing the rate of increase in the median concentration of metabolites from the WD group (Cw) compared to the CD group (Cc). After fitting a linear model, estimated marginal means (EMMs) were obtained and compared as a post-hoc test ( $p < 0.05$  were included in the plots before FDR correction). Effect size for female samples at 15 months of age are included. (a) Serum metabolites involved in glycolysis and TCA cycle; (b) serum and urine TMA and TMAO; (c) urinary metabolites involved in NNMT pathway; (d) urinary glucose and TCA cycle intermediates; (e) urinary metabolites associated with the PEMT and BHMT pathways and serum methionine.

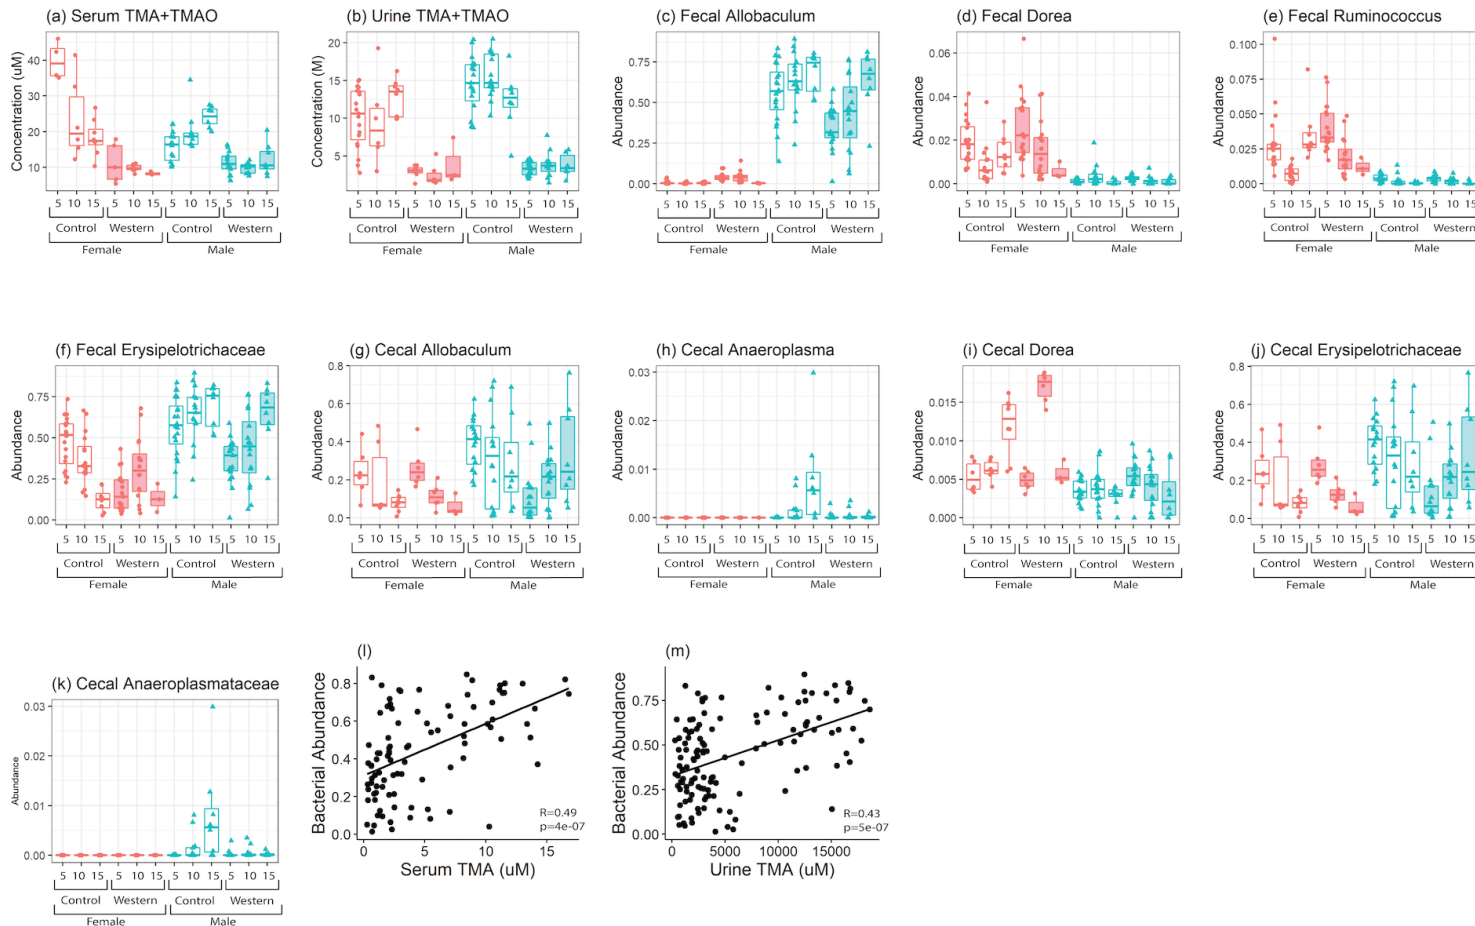

**Supplementary Figure 4.** Boxplots showing the concentrations of TMA+TMAO from (a) serum or (b) urine samples. Boxplots showing relative abundance of (c) fecal *Allobaculum*; (d) fecal *Dorea*; (e) fecal *Ruminococcus*; (f) fecal *Erysipelotrichaceae*; (g) cecal *Allobaculum*; (h) cecal *Anaeroplasma*; (i) cecal *Dorea*; (j) cecal *Erysipelotrichaceae*; (k) cecal *Anaeroplasmataceae*. Scatter plots showing the correlation between the relative abundance of fecal *Erysipelotrichaceae* and (l) serum TMA or (m) urinary TMA.

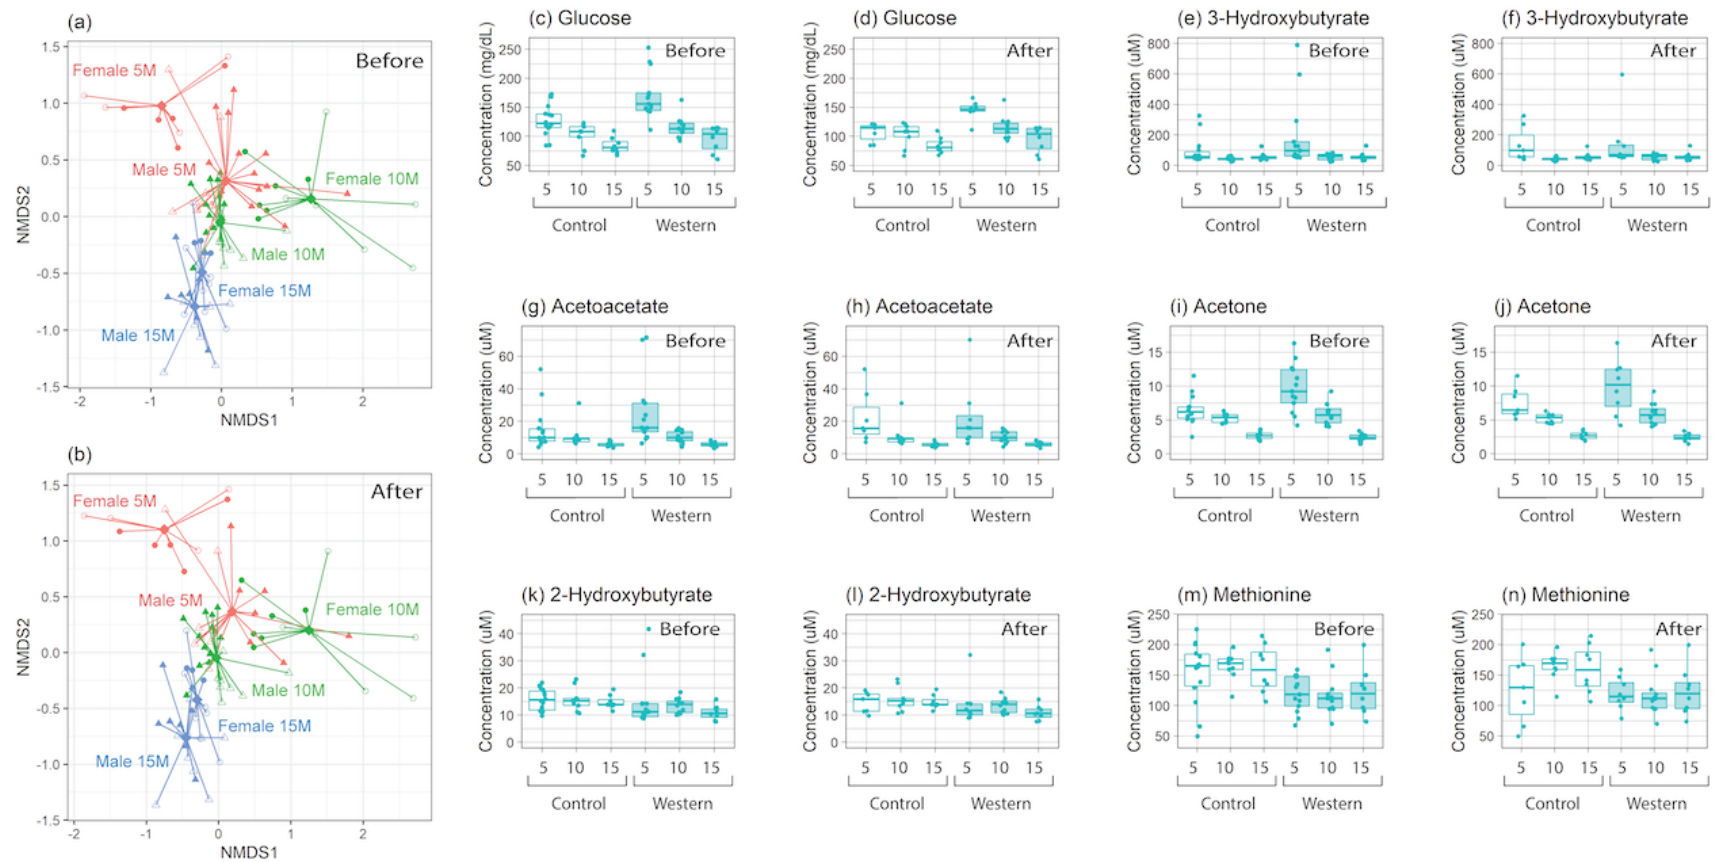

**Supplementary Figure 5.** NMDS plots before and after removing samples with high glucose. (a) NMDS plot generated with all samples included (“full dataset”); (b) NMDS plot generated without male samples at 5 months of age that showed high blood glucose level (“reduced dataset”). Samples collected at 5, 10, and 15 months of age are in red, green and blue respectively; samples collected from female and male are expressed with circles and triangles respectively; samples on the CD and WD are open or closed, respectively. Boxplots showing the concentrations of serum metabolites from male mice. The middle line in the box plot represents the median of data. CD samples are expressed as empty boxes and WD samples are expressed as filled boxes. Boxplots were generated using either full or reduced for (c), (d) glucose; (e), (f) 3-Hydroxybutyrate; and (g), (h) acetoacetate; (i), (j) acetone; (k), (l) 2-Hydroxybutyrate; (m), (n) methionine.

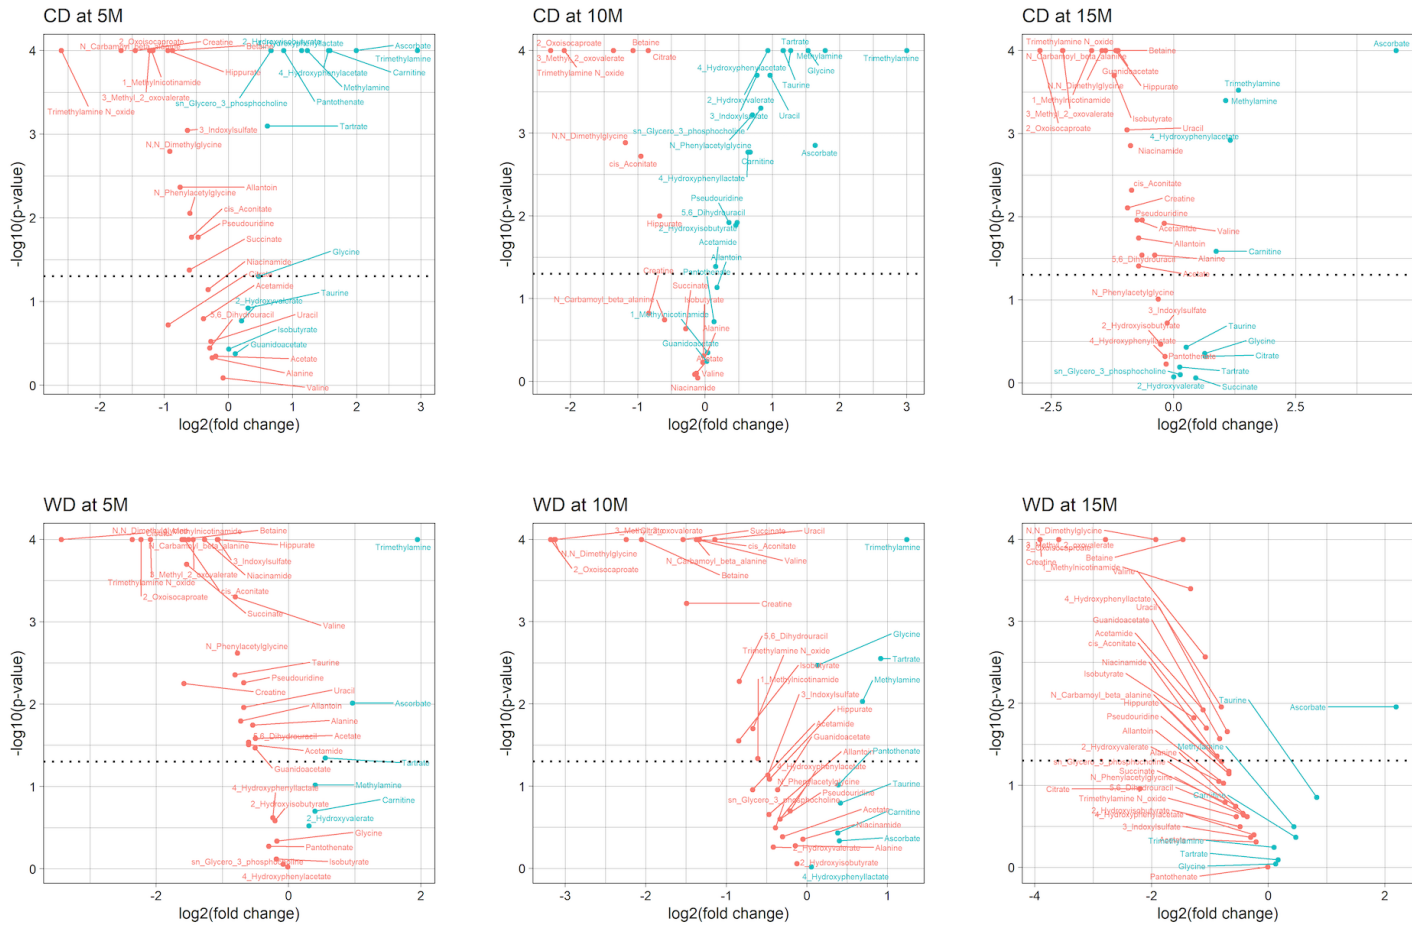

**Supplementary Figure 6.** Volcano plots showing the difference in the urine metabolome between male and female mice on either the CD or WD. Among 38 urine metabolites that showed significant impact of sex in Supplementary Table 3, a post-hoc test was applied to assess the impact of sex in mice on either the CD or WD at each age. Metabolites with higher levels in male mice are indicated in blue, whereas those with higher levels in female mice indicated in red. Metabolites above the dotted line correspond to those with a p-value < 0.05.

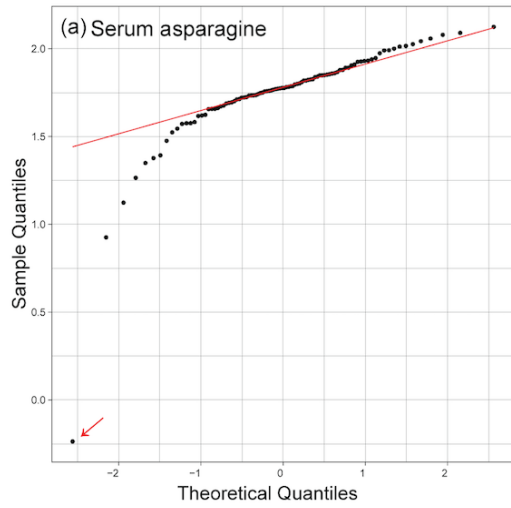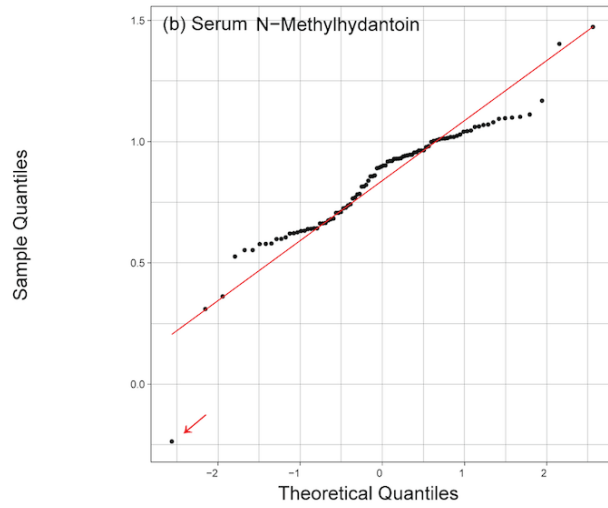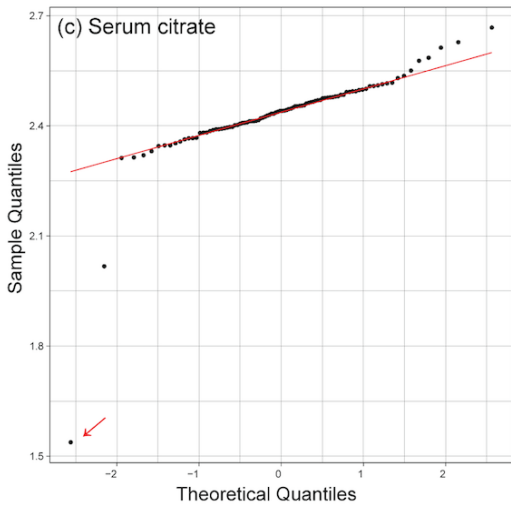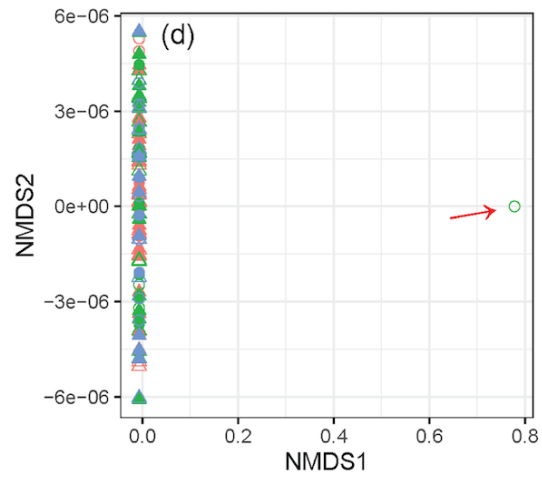

**Supplementary Figure 7.** Outliers removed in this study from the serum and cecal datasets (indicated with red arrows). Outliers in the serum samples were identified using QQplots: (a) asparagine; (b) N-Methylhydantoin; and (c) citrate. The outlier in the cecal microbiome dataset was identified by (d) NMDS plot.
